# Supplementary material for: Characterisation of Endogenous Peptides Present in Virgin Olive Oil
Source: MDPI journal article supplement (doi:10.3390/ijms23031712), 2022-02-02
Supplement: s1 [file s1]

**Supplemental material Table S1.** Endogenous peptides identified in VOO olive oil using Peaks database (DB) algorithm, filtered by -10lgP score >25 (32 peptides). -10lgP score, statistical significance of the peptide-precursor spectrum match; N, number of amino acids; m/z, precursor mass-to-charge ratio; Mass, peptide mass in Da; RT, retention time; ppm, precursor mass error; Area, peptide abundance shown as area under the curve of the detected peptide; Accession, the accession number of the highest-scoring protein containing this peptide. Oxidised methionine is indicated by a pair of parentheses enclosing the modification mass (+15.99).

| No. | Sequence                | -10lgP | n  | m/z      | Mass      | RT    | ppm  | Area     | Accession                                           |
|-----|-------------------------|--------|----|----------|-----------|-------|------|----------|-----------------------------------------------------|
| 1   | LDTANEMNQLDLQFR         | 93.56  | 15 | 904.4365 | 1806.8571 | 34.18 | 8.3  | 1.08E+06 | OE9A085162P3:OE9A085162P1:OE9A085162P2              |
| 2   | VVLQDTSNNVNQLD          | 77.73  | 14 | 779.8878 | 1557.7634 | 24.96 | 5.9  | 3.44E+05 | OE9A032471P1:OE9A042009P1                           |
| 3   | VVLQDTSNNVNQLDDIPRRFFLA | 63.26  | 23 | 892.1344 | 2673.3875 | 48.98 | 5.2  | 0        | OE9A032471P1:OE9A042009P1                           |
| 4   | AVVPIWLQPDTPAR          | 57.79  | 14 | 781.9397 | 1561.8616 | 38.09 | 9.6  | 4.39E+05 | OE9A001718P2:OE9A001718P1                           |
| 5   | IFSGGESSGQPR            | 57.53  | 12 | 611.2961 | 1220.5785 | 22.47 | 6.8  | 1.24E+05 | OE9A032471P1:OE9A042009P1                           |
| 6   | DTSNNVNQLDDIPRR         | 46.89  | 15 | 586.2892 | 1755.8500 | 26.25 | 5.1  | 1.54E+05 | OE9A032471P1:OE9A042009P1                           |
| 7   | NCSTSIISG               | 39.01  | 9  | 441.2062 | 880.3961  | 35.88 | 9.5  | 3.49E+07 | OE9A087501P1                                        |
| 8   | VHVFRFDQNQDLLPIGN       | 34.71  | 17 | 671.3506 | 2011.0275 | 48.03 | 8.8  | 1.53E+04 | OE9A001718P2:OE9A001718P1                           |
| 9   | LLLGAGCM(+15.99)        | 34.51  | 8  | 397.1985 | 792.3874  | 33.76 | 1.4  | 1.24E+07 | OE9A117792P1                                        |
| 10  | QDTSNNVNQLDDIPRR        | 33.36  | 16 | 628.9771 | 1883.9086 | 26.36 | 8.0  | 2.06E+06 | OE9A032471P1:OE9A042009P1                           |
| 11  | FSASTEGS                | 32.74  | 8  | 393.1665 | 784.3239  | 25.27 | 0.5  | 9.63E+05 | OE9A013295P1:OE9A042038P1:OE9A062197P1              |
| 12  | INTISGR                 | 31.90  | 7  | 380.7197 | 759.4239  | 20.53 | 8.6  | 1.38E+05 | OE9A032471P1:OE9A042009P1                           |
| 13  | LDGNSSAR                | 31.66  | 8  | 410.1964 | 818.3882  | 18.63 | -4.9 | 1.41E+05 | OE9A106456P1                                        |
| 14  | VCGEAFGKA               | 31.36  | 9  | 441.2060 | 880.4113  | 33.38 | -8.2 | 4.18E+06 | OE9A058866P1                                        |
| 15  | KGGGGSGSAGGGGS          | 31.14  | 15 | 525.2275 | 1048.4534 | 35.95 | -4.9 | 4.01E+06 | OE9A057915P1                                        |
| 16  | SGPGNHEQ                | 30.94  | 8  | 413.1722 | 824.3413  | 30.38 | -6.5 | 0        | OE9A054657P1:OE9A104108P1                           |
| 17  | LGGGGSSGGAAC            | 30.30  | 12 | 447.1878 | 892.3708  | 20.67 | -3.4 | 4.31E+05 | OE9A026632P1                                        |
| 18  | NALLCSNS                | 30.09  | 8  | 411.1950 | 820.3749  | 27.63 | 8.1  | 2.25E+05 | OE9A100476P1                                        |
| 19  | CPANGFY                 | 29.54  | 7  | 386.1598 | 770.3057  | 26.19 | 6.7  | 0        | OE9A087887P1                                        |
| 20  | LKSHKCES                | 29.07  | 8  | 466.2317 | 930.4593  | 35.48 | -3.8 | 1.87E+05 | OE9A081468P1                                        |
| 21  | LSQLECS                 | 28.48  | 7  | 390.1821 | 778.3531  | 21.25 | 3.0  | 2.46E+05 | OE9A013196P1:OE9A013196P3                           |
| 22  | HSLGGGTGSGMG            | 27.92  | 12 | 509.2202 | 1016.4346 | 31.22 | -1.2 | 4.96E+04 | OE9A118395P1:OE9A084266P1                           |
| 23  | SIPGDCDSGSL             | 27.69  | 12 | 582.2623 | 1162.5176 | 34.63 | 1.0  | 4.80E+05 | OE9A102443P1                                        |
| 24  | VVGAACLY                | 27.50  | 8  | 398.2053 | 794.3997  | 28.98 | 3.0  | 2.49E+05 | OE9A003377P2                                        |
| 25  | LPGPGNMGC               | 27.50  | 9  | 423.1788 | 844.3571  | 27.03 | -9.3 | 1.57E+05 | OE9A039431P1:OE9A039431P2:OE9A039431P3              |
| 26  | ILGICGAM(+15.99)        | 26.58  | 8  | 397.1978 | 792.3874  | 30.93 | -0.6 | 3.28E+06 | OE9A070714P1                                        |
| 27  | IPWGHPS                 | 26.31  | 7  | 397.1978 | 792.3918  | 35.62 | -6.2 | 1.62E+05 | OE9A056660P1:OE9A056660P2:OE9A056660P3:OE9A056660P5 |
| 28  | LLQGCYP                 | 26.09  | 7  | 397.1985 | 792.3840  | 25.33 | 5.6  | 0        | OE9A103223P2:OE9A103223P1:OE9A043277P1              |

|    |                  |       |    |          |           |       |      |          |                                            |
|----|------------------|-------|----|----------|-----------|-------|------|----------|--------------------------------------------|
| 29 | YSLLCGA          | 25.78 | 7  | 363.6724 | 725.3418  | 31.05 | -8.5 | 1.10E+05 | OE9A046079P2                               |
| 30 | GGSGGGGAGAGAGAGG | 25.64 | 16 | 509.2130 | 1016.4271 | 26.53 | -8.0 | 1.12E+06 | OE9A050974P2                               |
| 31 | NHHLSGL          | 25.53 | 7  | 389.1993 | 776.3929  | 34.78 | -4.0 | 4.96E+04 | OE9pt000020P1                              |
| 32 | DGAITGGSGGGS     | 25.17 | 12 | 468.2006 | 934.3992  | 19.26 | -6.0 | 1.57E+04 | OE9A076082P4:OE9A076082P5:<br>OE9A076082P1 |
