# Supplementary material for: Characterisation of Endogenous Peptides Present in Virgin Olive Oil
Source: MDPI journal article supplement (doi:10.3390/ijms23031712), 2022-02-02

**Supplemental material Figure S1.** Fragmentation spectra, total ion chromatogram and amino acid sequence of peptides identified in VOO by Peaks by *de novo* sequencing algorithm. Fragment ion tables for b and y ions (monoisotopic masses) are included.

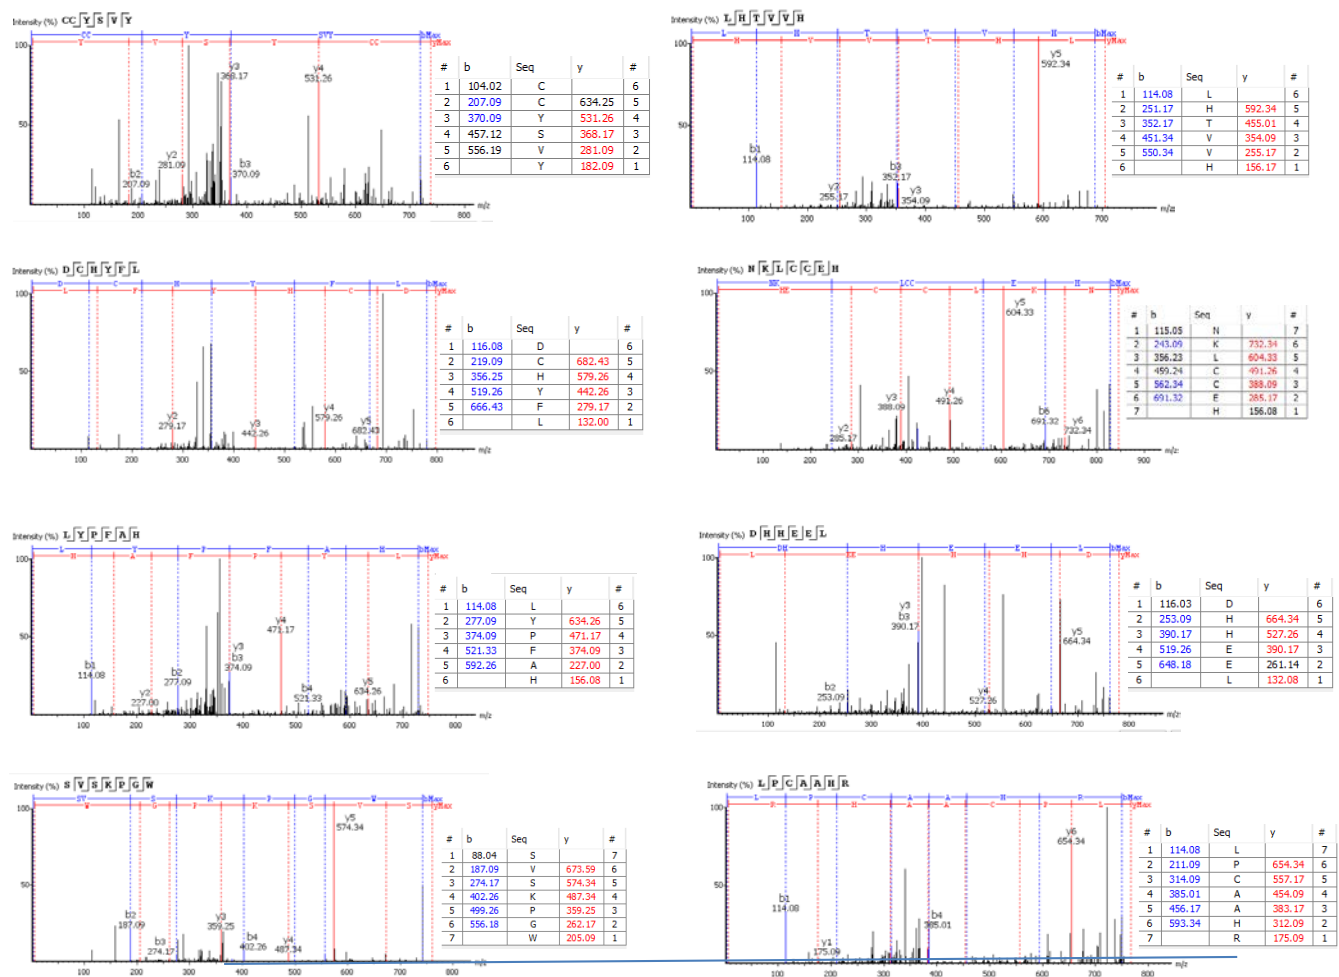

Supplement: s1 [file s1]
