# Supplementary material for: Characterisation of Endogenous Peptides Present in Virgin Olive Oil
Source: MDPI journal article supplement (doi:10.3390/ijms23031712), 2022-02-02
Supplement: s1 [file s1]

**Supplemental material Table S3.** Endogenous peptides identified in VOO olive oil by de novo sequencing with ALC value above 80% (63 peptides). ALC, average local confidence; N, number of amino acids; m/z, precursor mass-to-charge ratio; Mass, peptide mass in Da; RT, retention time; Area, peptide abundance shown as area under the curve of the detected peptide; ppm, precursor mass error; local confidence, local confidence score for each amino acid of the peptide identified by de novo sequencing. Oxidised methionine is indicated by a pair of parentheses enclosing the modification mass (+15.99).

| No. | Peptide                | ALC (%) | N  | m/z      | Mass      | RT    | Area     | ppm  | local confidence (%)          |
|-----|------------------------|---------|----|----------|-----------|-------|----------|------|-------------------------------|
| 1   | CCYSVY                 | 95      | 6  | 369.1365 | 736.256   | 24.36 | 5.77E+05 | 3.2  | 92 97 99 93 92 98             |
| 2   | DCHYFL                 | 94      | 6  | 399.1715 | 796.3214  | 25.13 | 6.41E+04 | 8.9  | 92 98 98 98 90 93             |
| 3   | LYPFAH                 | 94      | 6  | 374.1952 | 746.3751  | 19.07 | 3.59E+05 | 1    | 99 99 99 85 89 93             |
| 4   | SVSKPGW                | 92      | 7  | 380.7006 | 759.3915  | 14.03 | 1.85E+05 | -6.5 | 93 97 99 99 89 78 93          |
| 5   | LHTVVH                 | 91      | 6  | 353.2084 | 704.397   | 26.06 | 8.67E+04 | 7.6  | 99 93 93 92 85 87             |
| 6   | NKLCCEH                | 91      | 7  | 423.6815 | 845.3524  | 29.15 | 0        | -4.7 | 84 95 98 94 86 94 89          |
| 7   | DHHEEL                 | 91      | 6  | 390.1661 | 778.3246  | 36.35 | 7.71E+04 | -8.9 | 89 91 97 91 92 85             |
| 8   | LPCAAHR                | 90      | 7  | 384.2062 | 766.3908  | 19.09 | 2.70E+05 | 9.2  | 98 79 79 89 97 96 95          |
| 9   | LALGAM(+15.99)DF       | 89      | 8  | 427.2069 | 852.4051  | 25.74 | 1.92E+06 | -6.8 | 93 92 89 69 96 96 92 89       |
| 10  | LMEAQR                 | 89      | 6  | 374.1952 | 746.3745  | 19.07 | 3.59E+05 | 1.8  | 99 98 98 81 73 87             |
| 11  | YDSDLR                 | 89      | 6  | 384.6771 | 767.345   | 21.89 | 1.70E+05 | -7   | 99 99 97 76 88 76             |
| 12  | EM(+15.99)CPM(+15.99)Y | 88      | 6  | 403.1284 | 804.2493  | 22.84 | 0        | -8.7 | 90 78 87 82 95 98             |
| 13  | HCLPSSH                | 88      | 7  | 390.6767 | 779.3384  | 44.29 | 0        | 0.5  | 93 96 99 77 84 80 85          |
| 14  | LYNDVR                 | 87      | 6  | 390.2079 | 778.3973  | 20.79 | 8.11E+05 | 5.1  | 99 99 93 85 76 75             |
| 15  | MFLSYNY                | 87      | 7  | 469.2099 | 936.4052  | 19.37 | 0        | 0.2  | 85 87 96 86 88 79 87          |
| 16  | DYSHMESH               | 86      | 8  | 503.1901 | 1004.3658 | 28.15 | 1.91E+05 | -0.1 | 74 71 84 82 93 98 93 90       |
| 17  | EMHHDQ                 | 85      | 6  | 398.6558 | 795.297   | 24.99 | 3.81E+05 | 0    | 98 97 83 88 71 76             |
| 18  | YQAHHA                 | 85      | 6  | 363.6714 | 725.3245  | 28.15 | 4.20E+05 | 5.1  | 88 82 89 95 70 88             |
| 19  | LKSECCY                | 85      | 7  | 423.1809 | 844.3459  | 29.08 | 0        | 1.7  | 95 93 95 96 76 69 72          |
| 20  | YAHENTP                | 85      | 7  | 416.189  | 830.3559  | 16.36 | 7.15E+05 | 9.1  | 93 94 92 89 75 78 73          |
| 21  | NSSYAGFR               | 85      | 8  | 451.2076 | 900.4089  | 18.19 | 7.11E+03 | -9.2 | 82 92 88 79 88 71 95 86       |
| 22  | DFMPDY                 | 84      | 6  | 394.1516 | 786.2894  | 18.83 | 0        | -0.9 | 85 86 94 76 81 86             |
| 23  | DTLSAGMH               | 84      | 8  | 416.189  | 830.3593  | 16.36 | 7.15E+05 | 5    | 88 93 97 96 91 56 84 71       |
| 24  | NSCAMRA                | 84      | 7  | 376.6606 | 751.3105  | 19.64 | 0        | -5.3 | 73 82 82 88 98 82 87          |
| 25  | HQSDNAECKM             | 84      | 10 | 581.7358 | 1161.4543 | 41.36 | 0        | 2.4  | 85 90 95 78 69 92 92 88 81 75 |
| 26  | YCMMSERH               | 84      | 8  | 528.707  | 1055.3987 | 32.72 | 0        | 0.8  | 95 98 97 94 73 80 67 72       |
| 27  | HM(+15.99)VHQT         | 84      | 6  | 384.6764 | 767.3385  | 25.3  | 1.10E+05 | -0.4 | 74 86 93 93 71 88             |
| 28  | LYLAMH                 | 84      | 6  | 374.1952 | 746.3785  | 19.07 | 3.59E+05 | -3.5 | 98 99 90 78 66 74             |
| 29  | LPACEGCL               | 84      | 8  | 403.1799 | 804.351   | 26.08 | 0        | -7.2 | 91 78 77 85 95 62 92 93       |
| 30  | YEHSWH                 | 84      | 6  | 429.6818 | 857.3456  | 41.36 | 0        | 3.9  | 75 91 77 84 80 98             |

# Supplemental data 2 (cont).

| No. | Peptide                | ALC (%) | N  | m/z      | Mass      | RT    | Area     | ppm  | local confidence (%)             |
|-----|------------------------|---------|----|----------|-----------|-------|----------|------|----------------------------------|
| 31  | FVESQGS                | 84      | 7  | 377.1768 | 752.334   | 25.85 | 4.75E+05 | 6.5  | 97 95 98 85 80 57 75             |
| 32  | LYLFSH                 | 83      | 6  | 390.2083 | 778.4014  | 21.28 | 4.35E+05 | 0.9  | 88 93 86 73 82 79                |
| 33  | VLSSSGRYGGP            | 83      | 11 | 540.279  | 1078.5408 | 22.84 | 7.27E+04 | 2.5  | 95 98 98 95 75 45 66 85 95 82 82 |
| 34  | NCCAPKF                | 83      | 7  | 391.6669 | 781.3251  | 29.62 | 0        | -7.6 | 68 79 99 99 74 70 90             |
| 35  | KAHSAYD                | 83      | 7  | 396.1902 | 790.361   | 20.79 | 1.18E+05 | 6.1  | 76 77 82 98 91 79 76             |
| 36  | FLGSAEW                | 83      | 7  | 405.1957 | 808.3755  | 21.15 | 2.46E+05 | 1.6  | 70 80 79 90 77 89 94             |
| 37  | LLEM(+15.99)HANY       | 83      | 8  | 503.7346 | 1005.459  | 38.13 | 0        | -4.2 | 92 87 98 95 87 52 79 70          |
| 38  | YDCGLFN                | 83      | 7  | 416.1675 | 830.3268  | 21.5  | 0        | -7.7 | 89 85 85 62 91 83 83             |
| 39  | YCFCMY                 | 83      | 6  | 415.1432 | 828.2645  | 31.37 | 0        | 8.9  | 68 74 92 92 83 87                |
| 40  | LCGPLCH                | 82      | 7  | 371.6688 | 741.3302  | 27.24 | 1.38E+06 | -9.7 | 96 90 52 60 95 89 93             |
| 41  | KAHCLM(+15.99)Y        | 82      | 7  | 441.2062 | 880.3936  | 35.88 | 3.49E+07 | 4.9  | 66 75 95 99 89 73 79             |
| 42  | DM(+15.99)RRVM(+15.99) | 82      | 6  | 420.2005 | 838.379   | 23.83 | 3.15E+05 | 8.9  | 69 78 85 88 78 95                |
| 43  | HCGSLDH                | 82      | 7  | 384.6577 | 767.3021  | 28.11 | 1.20E+05 | -1.5 | 85 85 83 88 82 73 78             |
| 44  | LRDDPR                 | 82      | 6  | 386.2092 | 770.4034  | 20.54 | 0        | 0.4  | 92 71 74 79 79 95                |
| 45  | HCGHDAE                | 81      | 8  | 436.1471 | 870.2748  | 22.91 | 2.75E+05 | 5.6  | 57 68 78 90 96 89 86 90          |
| 46  | LELHAGEY               | 81      | 8  | 466.2323 | 930.4446  | 29.38 | 5.75E+05 | 5.7  | 88 97 97 79 90 45 87 69          |
| 47  | YDVSMVSE               | 81      | 8  | 465.1997 | 928.3848  | 32.16 | 0        | 0    | 89 86 89 97 85 61 63 79          |
| 48  | VVSCSCHCPY             | 81      | 10 | 549.2114 | 1096.4141 | 32.91 | 5.35E+06 | -5.3 | 78 80 86 93 84 88 86 88 61 66    |
| 49  | YCARCCCE               | 81      | 8  | 475.6541 | 949.2914  | 19.59 | 1.39E+04 | 2.4  | 85 77 85 82 95 82 70 70          |
| 50  | LYPAQME                | 81      | 7  | 426.2006 | 850.3895  | 26.25 | 8.21E+05 | -3.4 | 93 89 85 87 85 54 73             |
| 51  | LKSHCQES               | 81      | 8  | 466.2209 | 930.4229  | 35.65 | 0        | 4.8  | 93 91 92 88 60 62 92 69          |
| 52  | DCHPPRS                | 81      | 7  | 406.1794 | 810.3442  | 26.18 | 1.49E+05 | 0    | 92 96 98 91 66 51 71             |
| 53  | LQAAYDS                | 80      | 7  | 384.1851 | 766.3497  | 28.92 | 9.15E+05 | 7.8  | 76 60 61 86 98 93 91             |
| 54  | YLQPCSP                | 80      | 7  | 404.1874 | 806.3633  | 17.96 | 1.49E+06 | -3.7 | 84 86 86 72 87 76 73             |
| 55  | LNAPVMM(+15.99)        | 80      | 7  | 396.1902 | 790.3718  | 20.79 | 1.18E+05 | -7.5 | 79 65 85 78 92 82 82             |
| 56  | AM(+15.99)PPGGVAH      | 80      | 9  | 426.7036 | 851.3959  | 31.32 | 0        | -3.8 | 88 90 92 89 60 59 67 90 86       |
| 57  | LLYAHY                 | 80      | 6  | 390.2085 | 778.4014  | 28.41 | 6.58E+05 | 1.3  | 99 99 95 63 57 67                |
| 58  | YAATCSY                | 80      | 7  | 389.6585 | 777.3004  | 21.25 | 2.41E+05 | 2.7  | 87 95 90 86 57 59 88             |
| 59  | FNSCVHAQ               | 80      | 8  | 453.1988 | 904.3861  | 26.63 | 8.20E+04 | -3.5 | 79 79 88 86 92 68 76 73          |
| 60  | DHDAYD                 | 80      | 6  | 368.1342 | 734.2507  | 22.54 | 0        | 4.3  | 66 75 87 85 82 83                |
| 61  | NCYHCCAKVP             | 80      | 10 | 569.2372 | 1136.4565 | 31.89 | 6.67E+05 | 2.9  | 70 90 96 94 95 90 74 68 71 51    |
| 62  | LKHSGLCAC              | 80      | 9  | 466.2317 | 930.4415  | 35.48 | 1.87E+05 | 7.8  | 93 94 97 97 82 68 50 70 67       |
