# Supplementary material for: Characterisation of Endogenous Peptides Present in Virgin Olive Oil
Source: MDPI journal article supplement (doi:10.3390/ijms23031712), 2022-02-02
Supplement: s1 [file s1]

**Supplemental data S2.** Proteins identified as sources of endogenous peptides detected in VOO, with  $-10\log P$  score above 30. Protein coverage, supporting peptides and best peptide-spectrum matches (PSM) are shown. Protein  $-10\log P$  score, sum of the  $-10\log P$  scores of the protein's supporting peptides; Coverage (%), percentage of the protein sequence that is covered by the supporting peptides; Area Sample, protein relative abundance; #Peptides, number of high-confidence supporting peptides; #Unique, number of high confidence supporting peptides that are mapped to only one protein group; PTM, posttranslational modifications. Description, as seen in the FASTA data base.

Protein List

| Protein Group     | Protein ID | Accession                    | -10lgP | Coverage (%) | Coverage (%) Sample 1 | Area Sample 1 | #Peptides | #Unique | #Spec Sample 1 | PTM | Avg. Mass | Description  |
|-------------------|------------|------------------------------|--------|--------------|-----------------------|---------------|-----------|---------|----------------|-----|-----------|--------------|
| 1                 | 1          | <a href="#">OE9A032471P1</a> | 155.75 | 9            | 9                     | 2.8186E6      | 6         | 6       | 8              | N   | 51572     | OE9A032471P1 |
| 1                 | 2          | <a href="#">OE9A042009P1</a> | 155.75 | 9            | 9                     | 2.8186E6      | 6         | 6       | 8              | N   | 51725     | OE9A042009P1 |
| 165               | 11         | <a href="#">OE9A085162P3</a> | 93.56  | 4            | 4                     | 1.0776E6      | 1         | 1       | 1              | N   | 40777     | OE9A085162P3 |
| 165               | 12         | <a href="#">OE9A085162P1</a> | 93.56  | 4            | 4                     | 1.0776E6      | 1         | 1       | 1              | N   | 44093     | OE9A085162P1 |
| 165               | 13         | <a href="#">OE9A085162P2</a> | 93.56  | 3            | 3                     | 1.0776E6      | 1         | 1       | 1              | N   | 55757     | OE9A085162P2 |
| 3                 | 3          | <a href="#">OE9A001718P2</a> | 75.15  | 7            | 7                     | 4.5393E5      | 2         | 2       | 3              | N   | 47253     | OE9A001718P2 |
| 3                 | 4          | <a href="#">OE9A001718P1</a> | 75.15  | 7            | 7                     | 4.5393E5      | 2         | 2       | 3              | N   | 49955     | OE9A001718P1 |
| 9                 | 245        | <a href="#">OE9A057915P1</a> | 43.19  | 7            | 7                     | 4.0106E6      | 1         | 1       | 1              | N   | 21805     | OE9A057915P1 |
| 2                 | 82         | <a href="#">OE9A117792P1</a> | 43.16  | 2            | 2                     | 6.1091E6      | 1         | 1       | 1              | Y   | 38475     | OE9A117792P1 |
| 166               | 177        | <a href="#">OE9A087501P1</a> | 39.01  | 4            | 4                     | 3.4884E7      | 1         | 1       | 1              | N   | 27647     | OE9A087501P1 |
| 40                | 222        | <a href="#">OE9A013295P1</a> | 32.74  | 1            | 1                     | 9.6294E5      | 1         | 1       | 2              | N   | 72709     | OE9A013295P1 |
| 40                | 223        | <a href="#">OE9A042038P1</a> | 32.74  | 1            | 1                     | 9.6294E5      | 1         | 1       | 2              | N   | 75341     | OE9A042038P1 |
| 40                | 224        | <a href="#">OE9A062197P1</a> | 32.74  | 1            | 1                     | 9.6294E5      | 1         | 1       | 2              | N   | 75780     | OE9A062197P1 |
| 41                | 244        | <a href="#">OE9A106456P1</a> | 31.66  | 1            | 1                     | 7.3958E4      | 1         | 1       | 1              | N   | 86941     | OE9A106456P1 |
| 93                | 239        | <a href="#">OE9A058866P1</a> | 31.36  | 1            | 1                     | 4.1833E6      | 1         | 1       | 1              | N   | 108486    | OE9A058866P1 |
| 167               | 249        | <a href="#">OE9A054657P1</a> | 30.94  | 3            | 3                     | 0             | 1         | 1       | 1              | N   | 30439     | OE9A054657P1 |
| 167               | 250        | <a href="#">OE9A104108P1</a> | 30.94  | 2            | 2                     | 0             | 1         | 1       | 1              | N   | 41131     | OE9A104108P1 |
| 42                | 289        | <a href="#">OE9A026632P1</a> | 30.30  | 4            | 4                     | 4.3063E5      | 1         | 1       | 1              | N   | 30682     | OE9A026632P1 |
| 168               | 293        | <a href="#">OE9A100476P1</a> | 30.09  | 2            | 2                     | 2.2457E5      | 1         | 1       | 1              | N   | 38275     | OE9A100476P1 |
| 106               | 101        | <a href="#">OE9A087887P1</a> | 29.54  | 3            | 3                     | 0             | 1         | 1       | 1              | N   | 28540     | OE9A087887P1 |
| total 20 proteins |            |                              |        |              |                       |               |           |         |                |     |           |              |

OE9A032471P1

[back to list](#)

| [Protein Coverage](#) | [Supporting Peptides](#) | [Best Unique PSM](#) |

Protein Coverage:

1

MAKICLLSLS LVLLFSLSFA QQQLKGQCQI QKINALQPQY KIQSEGGVTE SYDYNDDQFQ CAGAAFLRHT IYRRSLLLP

81

YTSSPLLAYA VKSGILGIM ISGCPETFES SQESQQESHG QGQRFDRHQ KIGNFRQGDI IAVPAGAAHW IYNSGNEELV

161

LVLQDTSNN VNQLDDIPRR FFLA

GNPRSG QEQEQQPWQ PEKQYSRFDN VFKGFAVQVL AEA FNVDLET AKKLQENDQ

241

RGHVMVIEQG LQVISPPFTG EEQQYGEQNR RANGLEETIC TARVRQNIDN PSRADIYNPR AGRFTTANSL TLPILSFLQL

321

SAARGVLHRK AIMSPHWYMN CHTIVYATKG NARMQIVDNR GQAVFDDTIQ EGQVVVPHN FAVVKQAGDQ GFEWVEFNTN

401

ENAMINTISG R

TSFSRGLPV DVIVNAYQVS RKVAEQLKFN RQETL

IFSGG ESSGQPRVSS V

Supporting Peptides:

| Peptide                     | Uniq | -10lgP | Mass      | Length | ppm | m/z      | z | RT    | Fraction | Scan  | Source File                 | Area Sample 1 | #Feature | #Feature Sample 1 | Start | End | PTM | AScore | Found By |
|-----------------------------|------|--------|-----------|--------|-----|----------|---|-------|----------|-------|-----------------------------|---------------|----------|-------------------|-------|-----|-----|--------|----------|
| L.VVLQDTSNNVNQLD.D          | Y    | 77.73  | 1557.7634 | 14     | 5.9 | 779.8878 | 2 | 24.96 | 1        | 4137  | P2860-Aislado informe 2.raw | 3.4433E5      | 1        | 1                 | 162   | 175 |     |        | PEAI DE  |
| L.VVLQDTSNNVNQLDDIPRRFFLA.G | Y    | 63.26  | 2673.3875 | 23     | 5.2 | 892.1344 | 3 | 48.98 | 1        | 10542 | P2860-Aislado informe 2.raw | 0             | 0        | 0                 | 162   | 184 |     |        | PEAI DE  |
| L.IFSGGESSGQPR.V            | Y    | 57.53  | 1220.5785 | 12     | 6.8 | 611.2961 | 2 | 22.47 | 1        | 3436  | P2860-Aislado informe 2.raw | 1.2435E5      | 1        | 1                 | 446   | 457 |     |        | PEAI DE  |

total 6 peptides

| Peptide              | Uniq | -10lgP | Mass      | Length | ppm | m/z      | z | RT    | Fraction | Scan | Source File                 | Area Sample 1 | #Feature | #Feature Sample 1 | Start | End | PTM | AScore | Found By |
|----------------------|------|--------|-----------|--------|-----|----------|---|-------|----------|------|-----------------------------|---------------|----------|-------------------|-------|-----|-----|--------|----------|
| Q.DTSNNVNQLDDIPRR.F  | Y    | 46.89  | 1755.8500 | 15     | 5.1 | 586.2892 | 3 | 26.25 | 1        | 4526 | P2860-Aislado informe 2.raw | 1.5401E5      | 1        | 1                 | 166   | 180 |     |        | PEA/DE   |
| L.QDTSNNVNQLDDIPRR.F | Y    | 33.36  | 1883.9086 | 16     | 8.0 | 628.9771 | 3 | 26.36 | 1        | 4524 | P2860-Aislado informe 2.raw | 2.0584E6      | 1        | 1                 | 165   | 180 |     |        | PEA/DE   |
| M.INTISGR.T          | Y    | 31.90  | 759.4239  | 7      | 8.6 | 380.7197 | 2 | 20.53 | 1        | 2900 | P2860-Aislado informe 2.raw | 1.3753E5      | 1        | 1                 | 405   | 411 |     |        | PEA/DE   |

total 6 peptides

Best Unique PSM (Scan 4137, m/z=779.8878, z=2, RT=24.96, ppm=5.9):

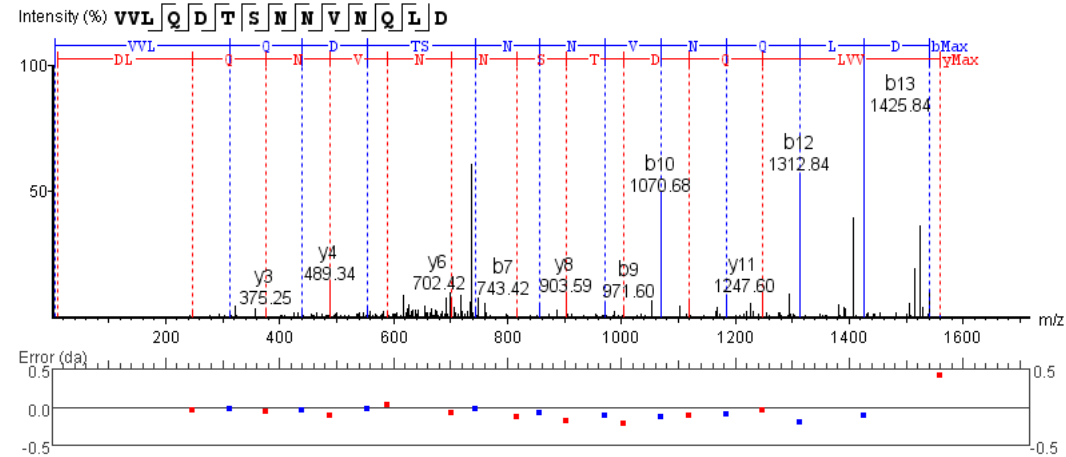

OE9A042009P1

[back to list](#)

[Protein Coverage](#) | [Supporting Peptides](#) | [Best Unique PSM](#) |

Protein Coverage:

1 MAKIICLLSL SLVLLFSLSF AQQQLKGQCQ IQKINALQPQ YKIQSEGGVT ESYDYNDDQF RCAGAAFLRH TIYRRSLLLP  
81 SYTSSPLLAY AVKGSIGLGI MISGCPETFE SSQESQQESQ GQGQRFDRH QKIGNFLQGD IIAFPAGAAH WIYNSGNEEL  
161 VL**VVLQDTSN NVNQLDDIPR RFFLA**GNPRS GQEQQQQQLW QPEKQYSRFD NVFKGFAVQV LAEAFNVDL TAKKLQEND  
241 QRGHVMNIEQ GLQVISPPFT GEEQQYGEQN RRANGLEETI CTARVRQNI NPSRADIYNP RAGRFTTANS LTLPILSFLQ  
321 LSAARGVLHR KAIMSPHWYM NCHTIVYATK GNARMQIVDN RGQAVFDDTI QEGQVVVVPH NFAVVKQAGD QGFWEVFNT  
401 NENAM**INTIS** GRTSSFRGLP VDVIVNAYQV SRKVAEQLKF NRQETL**IFSG GESSGQPRVS** SV

Supporting Peptides:

| Peptide                     | Uniq | -10lgP | Mass      | Length | ppm | m/z      | z | RT    | Fraction | Scan  | Source File                 | Area Sample 1 | #Feature | #Feature Sample 1 | Start | End | PTM | AScore | Found By |
|-----------------------------|------|--------|-----------|--------|-----|----------|---|-------|----------|-------|-----------------------------|---------------|----------|-------------------|-------|-----|-----|--------|----------|
| L.VVLQDTSNNVNQLD.D          | Y    | 77.73  | 1557.7634 | 14     | 5.9 | 779.8878 | 2 | 24.96 | 1        | 4137  | P2860-Aislado informe 2.raw | 3.4433E5      | 1        | 1                 | 163   | 176 |     |        | PEA/DE   |
| L.VVLQDTSNNVNQLDDIPRRFFLA.G | Y    | 63.26  | 2673.3875 | 23     | 5.2 | 892.1344 | 3 | 48.98 | 1        | 10542 | P2860-Aislado informe 2.raw | 0             | 0        | 0                 | 163   | 185 |     |        | PEA/DE   |
| L.IFSGGESSGQPR.V            | Y    | 57.53  | 1220.5785 | 12     | 6.8 | 611.2961 | 2 | 22.47 | 1        | 3436  | P2860-Aislado informe 2.raw | 1.2435E5      | 1        | 1                 | 447   | 458 |     |        | PEA/DE   |
| Q.DTSNNVNQLDDIPRR.F         | Y    | 46.89  | 1755.8500 | 15     | 5.1 | 586.2892 | 3 | 26.25 | 1        | 4526  | P2860-Aislado informe 2.raw | 1.5401E5      | 1        | 1                 | 167   | 181 |     |        | PEA/DE   |
| L.QDTSNNVNQLDDIPRR.F        | Y    | 33.36  | 1883.9086 | 16     | 8.0 | 628.9771 | 3 | 26.36 | 1        | 4524  | P2860-Aislado informe 2.raw | 2.0584E6      | 1        | 1                 | 166   | 181 |     |        | PEA/DE   |
| M.INTISGR.T                 | Y    | 31.90  | 759.4239  | 7      | 8.6 | 380.7197 | 2 | 20.53 | 1        | 2900  | P2860-Aislado informe 2.raw | 1.3753E5      | 1        | 1                 | 406   | 412 |     |        | PEA/DE   |

total 6 peptides

Best Unique PSM (Scan 4137, m/z=779.8878, z=2, RT=24.96, ppm=5.9):

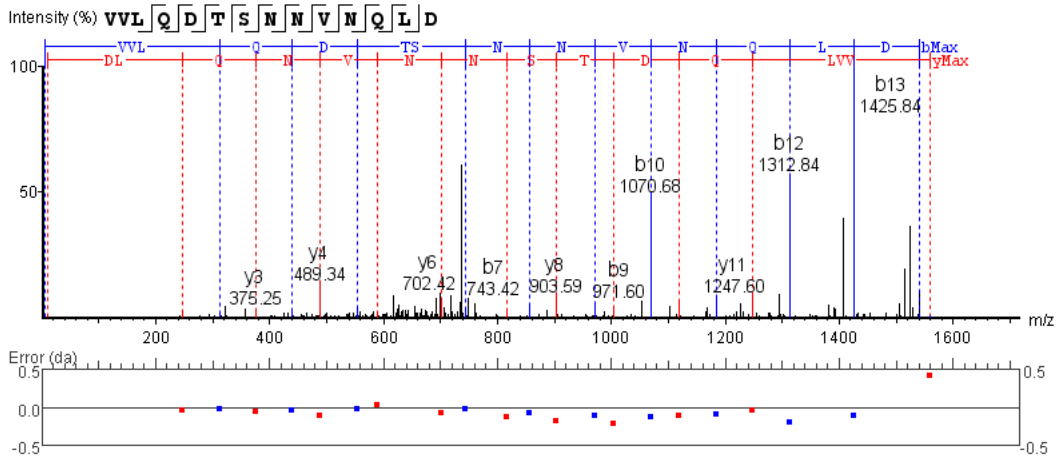

[back to list](#)

| [Protein Coverage](#) | [Supporting Peptides](#) | [Best Unique PSM](#) |

### Protein Coverage:

1 MRQQEQGSES QKQFFDRHQK VRQFRQGDVL ALPAGITLWL YNNGQEPLVT VSLLDTANEM NQLDLQFRNF FLAGNRNPQQ  
81 SQGQQQQEESQ SEGESPINNI FYGFDPKVLA DVYNVEPETI RKLKGEQDQR GRIVKAERFN VVLPREGQEE EQEGQQQGQG  
161 RNGLEETLCT LRLRENLGRP SRADVYNPRA GRLATLNSQT LPILNYLQLS AVKGVLYRNA IMAPHWNVNA HSVIYITRGS  
241 SRLQVVGHSQ NLVFDGEVKE NQLIIIPQSF VVIKKAGDQG CEWIAFKTND NAMISPLAGR LSAFRSMPVD VLANAYRVSK  
321 QEAQVLKFSR DESTLFSSSS SSMSLEKPKA MEYARDVIET VI

### Supporting Peptides:

| Peptide             | Uniq | -10lgP | Mass      | Length | ppm | m/z      | z | RT    | Fraction | Scan | Source File                 | Area Sample 1 | #Feature | #Feature Sample 1 | Start | End | PTM | AScore | Found By |
|---------------------|------|--------|-----------|--------|-----|----------|---|-------|----------|------|-----------------------------|---------------|----------|-------------------|-------|-----|-----|--------|----------|
| L.LDTANEMNQLDLQFR.N | Y    | 93.56  | 1806.8571 | 15     | 8.3 | 904.4365 | 2 | 34.18 | 1        | 6794 | P2860-Aislado informe 2.raw | 1.0776E6      | 1        | 1                 | 54    | 68  |     |        | PEAKS DB |
| total 1 peptides    |      |        |           |        |     |          |   |       |          |      |                             |               |          |                   |       |     |     |        |          |

**Best Unique PSM (Scan 6794, m/z=904.4365, z=2, RT=34.18, ppm=8.3):**

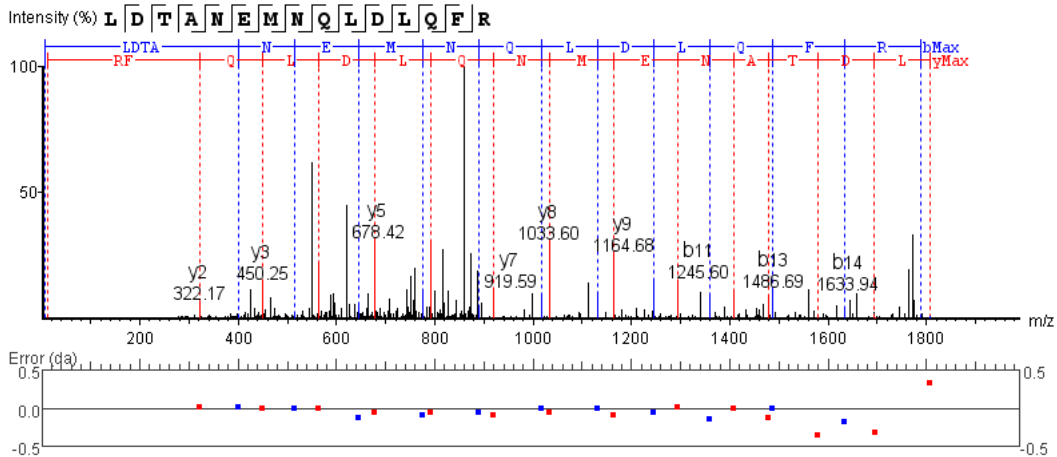

[back to list](#)

| [Protein Coverage](#) | [Supporting Peptides](#) | [Best Unique PSM](#) |

### Protein Coverage:

1 MRQQEQGSES QKQFFDRHQK VRQFRQGDVL ALPAGITLWL YNNGQEPLVT VSLLDTANEM NQLDLQFRVR ISEISWLVSN  
81 IIRDFIEIFT IFFFQNFFLA GNRNPQQSQG QQQEEESQSEG ESPINNIFYG FPDKVLADVY NVEPETIRKL KGEQDQGRRI  
161 VKAERFNVVL PREGQEEEQE GQQGQGGRNG LEETLCTLRL RENLGRPSRA DVYNPRAGRL ATLNSQTLPI LNYLQLSAVK  
241 GVLRYNAIMA PHWNVNAHSV IYITRGSSRL QVVGHSGNLV FDGEVKENQL IIIPQSFVVI KKAGDQGC EW IAFKTDNAM  
321 ISPLAGRLSA FRSMFPVDVLA NAYRVSKQEA QVLKFSRDES TLFSSSSSSM SLEPKAMEY ARDVIETVI

### Supporting Peptides:

| Peptide            | Uniq | -10lgP | Mass      | Length | ppm | m/z      | z | RT    | Fraction | Scan | Source File                 | Area Sample 1 | #Feature | #Feature Sample 1 | Start | End | PTM | AScore | Found By |
|--------------------|------|--------|-----------|--------|-----|----------|---|-------|----------|------|-----------------------------|---------------|----------|-------------------|-------|-----|-----|--------|----------|
| L.LDTANEMNQDLQFR.V | Y    | 93.56  | 1806.8571 | 15     | 8.3 | 904.4365 | 2 | 34.18 | 1        | 6794 | P2860-Aislado informe 2.raw | 1.0776E6      | 1        | 1                 | 54    | 68  |     |        | PEAKS DB |
| total 1 peptides   |      |        |           |        |     |          |   |       |          |      |                             |               |          |                   |       |     |     |        |          |

Best Unique PSM (Scan 6794, m/z=904.4365, z=2, RT=34.18, ppm=8.3):

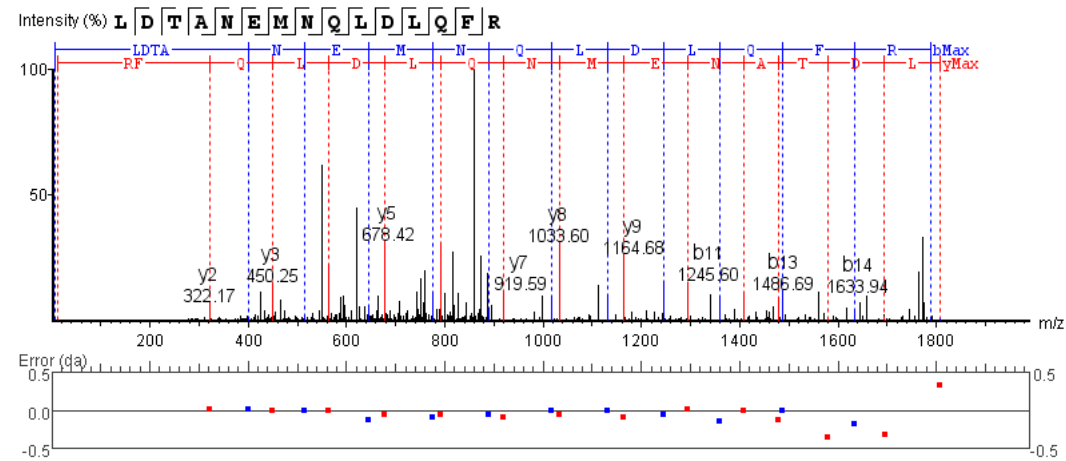

OE9A085162P2

[back to list](#)

[Protein Coverage](#) | [Supporting Peptides](#) | [Best Unique PSM](#) |

Protein Coverage:

|     |            |             |            |                         |            |            |            |            |
|-----|------------|-------------|------------|-------------------------|------------|------------|------------|------------|
| 1   | MAKLSLHFLS | FTLLFLFGGC  | LAQLGSQQQF | LWQKLQQQQQ              | HRLRAKTDCH | IERLTAQEPT | RRYDSEAGYA | EYWDPNNKQF |
| 81  | ECAGVAAVRT | SIQKNGLFLP  | HYNNVAQLIY | VVQKGKLLGA              | VIPGCAETFE | TEMRQQEQGS | ESQKQFFDRH | QKVRQFRQGD |
| 161 | VLALPAGITL | WLYNNGQEPL  | VTVSL      | <b>LDTAN EMNQLDLQFR</b> | NFFLAGNRNP | QQSQGQQQEE | SQSEGESPIN | NIFYGFDPKV |
| 241 | LADVYNVEPE | TIRKLKGEQD  | QRGRIVKAER | FNVVLPREGQ              | EEEQEGQQGQ | GGRNGLEETL | CTLRLRENLG | RPSRADVYNP |
| 321 | RAGRLATLNS | QTLPIILNYLQ | LSAVKGVLYR | NAIMAPHWNV              | NAHSVIYIYR | GSSRLQVVGH | SGNLVFDGEV | KENQLIIIPQ |
| 401 | SFVVIKKAGD | QGCEWIAFKT  | NDNAMISPLA | GRLSAFRSMP              | VDVLANAYRV | SKQEAQVLKF | SRDESTLFSS | SSSSMSLEKP |
| 481 | KAMEYARDVI | ETVI        |            |                         |            |            |            |            |

Supporting Peptides:

| Peptide             | Uniq | -10lgP | Mass      | Length | ppm | m/z      | z | RT    | Fraction | Scan | Source File                 | Area Sample 1 | #Feature | #Feature Sample 1 | Start | End | PTM | AScore | Found By |
|---------------------|------|--------|-----------|--------|-----|----------|---|-------|----------|------|-----------------------------|---------------|----------|-------------------|-------|-----|-----|--------|----------|
| L.LDTANEMNQLDLQFR.N | Y    | 93.56  | 1806.8571 | 15     | 8.3 | 904.4365 | 2 | 34.18 | 1        | 6794 | P2860-Aislado informe 2.raw | 1.0776E6      | 1        | 1                 | 186   | 200 |     |        | PEAKS DB |
| total 1 peptides    |      |        |           |        |     |          |   |       |          |      |                             |               |          |                   |       |     |     |        |          |

Best Unique PSM (Scan 6794, m/z=904.4365, z=2, RT=34.18, ppm=8.3):

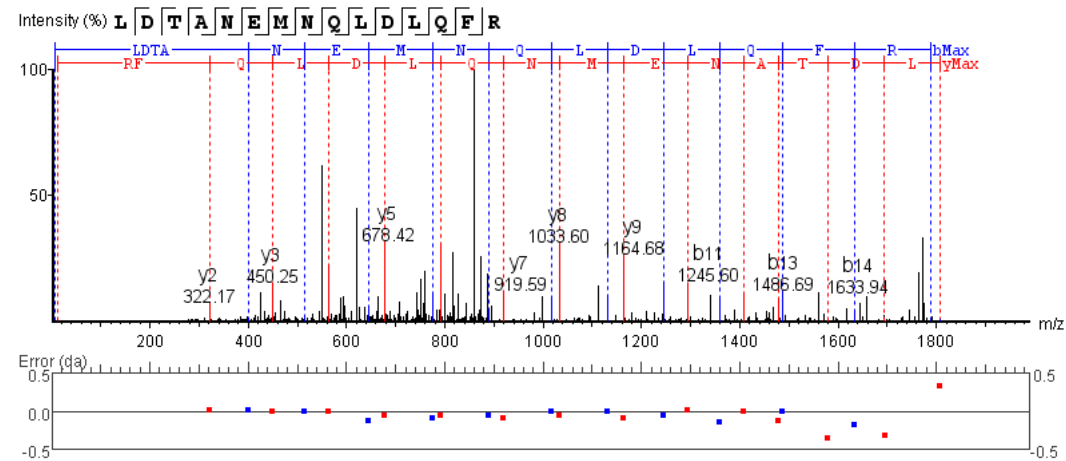

OE9A001718P2

[back to list](#)

[Protein Coverage](#) | [Supporting Peptides](#) | [Best Unique PSM](#) |

Protein Coverage:

|     |            |            |            |                    |             |            |                            |            |            |
|-----|------------|------------|------------|--------------------|-------------|------------|----------------------------|------------|------------|
| 1   | MKQAAGHGLL | FMVLFFLLPI | GSLSDDHHRH | KSSFRRVLIG         | HDSDKYAVIF  | DAGSTGSR   | <b>VH VFRFDQNQDL LPIGN</b> | EELELY     |            |
| 81  | VSTKPGLSSY | AADPQAAASS | LRPLLEEAE  | <b>A VVPIWLQPD</b> | <b>PAR</b>  | LGATAGL    | RLVEGDAAEK                 | ILDAVRNLFK | NESHLKYKHD |
| 161 | WVSILDGVQE | GYMWVTINY  | LLNTLGRSYA | ETVATIDLGG         | ASVQMAYAIS  | DENAAKAPHV | AANETYLLQK                 | NLKGNTYNLY |            |
| 241 | VHSYLKYGSK | AARAEIFKAS | RNSTNPCILE | GYEGTYTYGG         | VVYRVSA PRK | GANMKRCQIL | TRKALKINAP                 | CKYDSCTFNG |            |
| 321 | IWNGGGGDGE | KNLYLSSSFY | WTALDSGILK | QNATGGRILV         | NAYKDTAKTA  | CSTKFMDVKS | KFPDVQEENI                 | PYLCMDLVYI |            |
| 401 | YTLLVDGLGE | LKFLLILPEE | IINYNTNTA  |                    |             |            |                            |            |            |

Supporting Peptides:

| Peptide               | Uniq | -10lgP | Mass      | Length | ppm | m/z      | z | RT    | Fraction | Scan  | Source File                 | Area Sample 1 | #Feature | #Feature Sample 1 | Start | End | PTM | AScore | Found By |
|-----------------------|------|--------|-----------|--------|-----|----------|---|-------|----------|-------|-----------------------------|---------------|----------|-------------------|-------|-----|-----|--------|----------|
| E.AVVPIWLQPDTPAR.L    | Y    | 57.79  | 1561.8616 | 14     | 9.6 | 781.9397 | 2 | 38.09 | 1        | 7972  | P2860-Aislado informe 2.raw | 4.3861E5      | 1        | 1                 | 110   | 123 |     |        | PEAKS DB |
| R.VHVFRFDQNQDLLPIGN.E | Y    | 34.71  | 2011.0275 | 17     | 8.8 | 671.3506 | 3 | 48.03 | 1        | 10402 | P2860-Aislado informe 2.raw | 1.5322E4      | 1        | 1                 | 59    | 75  |     |        | PEAKS DB |
| total 2 peptides      |      |        |           |        |     |          |   |       |          |       |                             |               |          |                   |       |     |     |        |          |

Best Unique PSM (Scan 7972, m/z=781.9397, z=2, RT=38.09, ppm=9.6):

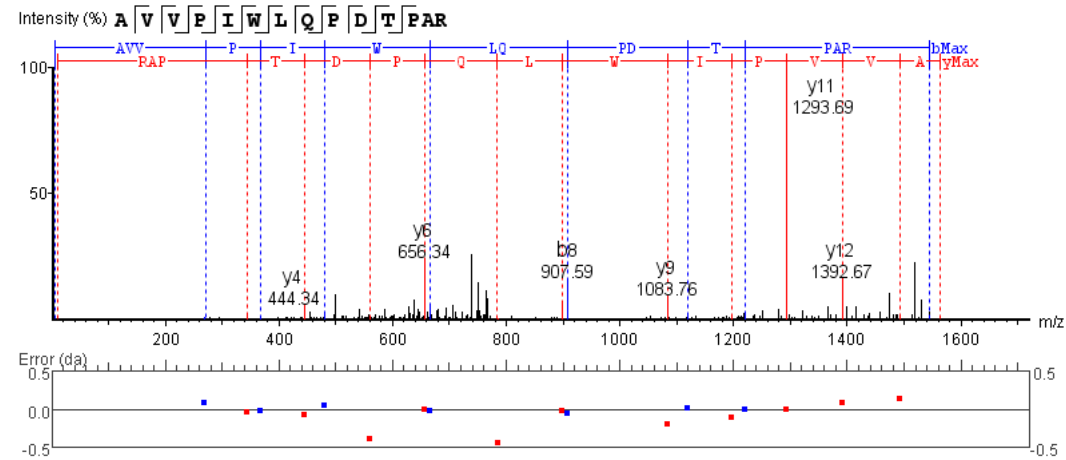

OE9A001718P1

[back to list](#)

[Protein Coverage](#) | [Supporting Peptides](#) | [Best Unique PSM](#) |

Protein Coverage:

|     |            |            |            |             |            |            |                     |            |
|-----|------------|------------|------------|-------------|------------|------------|---------------------|------------|
| 1   | MKQAAHGHL  | FMVLFFLLPI | GSLSSDHRH  | KSSFRRVLIG  | HDSDKYAVIF | DAGSTGSR   | VH VFRFDQNQDL LPIGN | EELELY     |
| 81  | VSTKPLSSY  | AADPQAAASS | LRPLLEEAE  | A VVPIWLQPD | PARLGATAGL | RLVEGDAAEK | ILDAVRNLFK          | NESHLKYKH  |
| 161 | WVSILDGVQE | GYMWVTINY  | LLNTLGRSYA | ETVATIDLGG  | ASVQMAYAIS | DENAAKAPHV | AANETYLLQK          | NLKGNTYNLY |
| 241 | VHSYLKYGSK | AARAEIFKAS | RNSTNPCILE | GYEGTYTYGG  | VVYRVSAPRK | GANMKRCQIL | TRKALKINAP          | CKYDSCTFNG |
| 321 | IWNGGGGDGE | KNLYLSSSFY | WTALDSGILK | QNATGGRILV  | NAYKDTAKTA | CSTKFMDVKS | KFPDVQEENI          | PYLCMDLVYI |
| 401 | YTLLVDGLDL | NASQKVEVVK | DVKYKNSEVE | ASWPLGCAID  | VTSSLTSKGL | IEKI       |                     |            |

Supporting Peptides:

| Peptide               | Uniq | -10lgP | Mass      | Length | ppm | m/z      | z | RT    | Fraction | Scan  | Source File                 | Area Sample 1 | #Feature | #Feature Sample 1 | Start | End | PTM | AScore | Found By |
|-----------------------|------|--------|-----------|--------|-----|----------|---|-------|----------|-------|-----------------------------|---------------|----------|-------------------|-------|-----|-----|--------|----------|
| E.AVVPIWLQPDTPAR.L    | Y    | 57.79  | 1561.8616 | 14     | 9.6 | 781.9397 | 2 | 38.09 | 1        | 7972  | P2860-Aislado informe 2.raw | 4.3861E5      | 1        | 1                 | 110   | 123 |     |        | PEAKS DB |
| R.VHVFRFDQNQDLLPIGN.E | Y    | 34.71  | 2011.0275 | 17     | 8.8 | 671.3506 | 3 | 48.03 | 1        | 10402 | P2860-Aislado informe 2.raw | 1.5322E4      | 1        | 1                 | 59    | 75  |     |        | PEAKS DB |
| total 2 peptides      |      |        |           |        |     |          |   |       |          |       |                             |               |          |                   |       |     |     |        |          |

Best Unique PSM (Scan 7972, m/z=781.9397, z=2, RT=38.09, ppm=9.6):

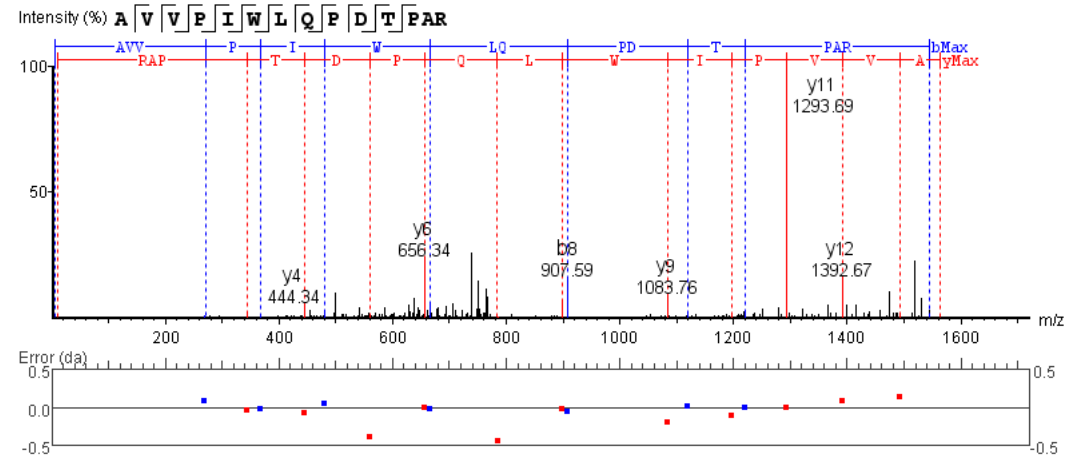

OE9A057915P1

[back to list](#)

[Protein Coverage](#) | [Supporting Peptides](#) | [Best Unique PSM](#) |

Protein Coverage:

1 ERVPVVKDET VVQDNDFEKR TSASVASTLQ SPPNKAEGTD NSNANAQNGT CSARSLKSA SISASKCIGV KGTNNTEES  
81 IAEHSEETQI YHSVVPYIDF ESISGRSFRK LDYPKNSVMP PSISPFTLV L GCHAGGKAGG KGGEGGKGGV GGVGAGKGGG  
161 GGSGSAGGGG SAKGSDGIGA SSGMMKAPGG GGATISRNLK AILKDILLKP GLPAGEKAGK

Supporting Peptides:

| Peptide            | Uniq | -10lgP | Mass      | Length | ppm  | m/z      | z | RT    | Fraction | Scan | Source File                 | Area Sample 1 | #Feature | #Feature Sample 1 | Start | End | PTM | AScore | Found By |
|--------------------|------|--------|-----------|--------|------|----------|---|-------|----------|------|-----------------------------|---------------|----------|-------------------|-------|-----|-----|--------|----------|
| G.KGGGGSGSAGGGGS.A | Y    | 31.14  | 1048.4534 | 15     | -4.9 | 525.2275 | 2 | 35.95 | 1        | 7525 | P2860-Aislado informe 2.raw | 4.0106E6      | 1        | 1                 | 157   | 171 |     |        | PEAKS DB |
| total 1 peptides   |      |        |           |        |      |          |   |       |          |      |                             |               |          |                   |       |     |     |        |          |

Best Unique PSM (Scan 7525, m/z=525.2275, z=2, RT=35.95, ppm=-4.9):

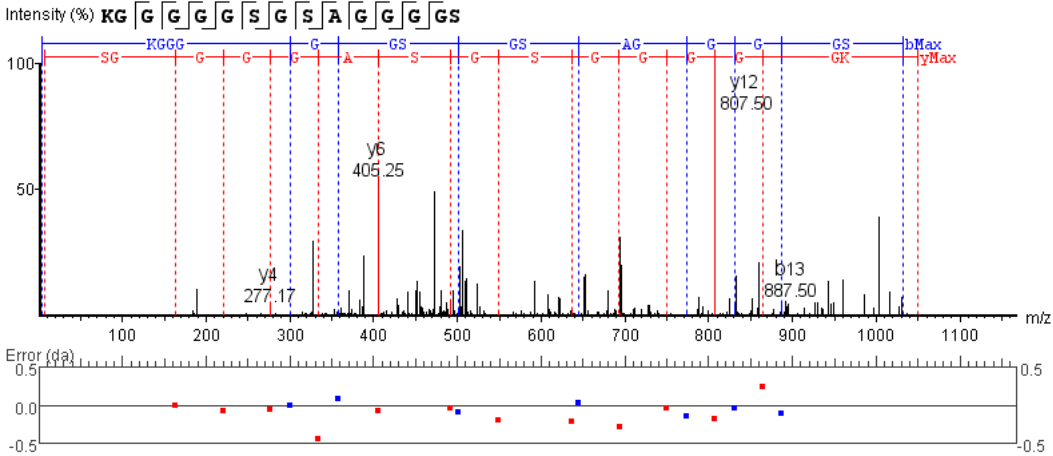

OE9A117792P1

[back to list](#)

| [Protein Coverage](#) | [Supporting Peptides](#) | [Best Unique PSM](#) |

Protein Coverage:

1 MVSPSPASAV AVAWRQVRHE AIQVEVADWS VRALRGKESK ELVVDGGSAL CESWAAACRR VRDESRIQW LHLLQSSLRV  
81 QLGFVFLFWV RQYQLLSPKR SFFFIINAF A AGVILLIGFI HVLPAFESL TSPHLSSVAM VSAIGTLMVD AYATSHYNKK  
161 SSSMAQIASG DEGGVVPVHT HPTHGHAHGS ASVETDSGET QVLRHRVISQ VLEIIHVSVI IGIALGASES PKTIKPLIAA  
241 LTFHQFFEGI GLGGCITQAK FKSRAVVIMA IFFSLTTPIG IVIGIGISNI YSETSPTALI IEGIFNSASA GILIYMALVD  
321 LLSADFISPK MQGNGKLQSG ANVSLLL GAG CMSLLAKWA

Supporting Peptides:

| Peptide              | Uniq | -10lgP | Mass     | Length | ppm | m/z      | z | RT    | Fraction | Scan | Source File                 | Area Sample 1 | #Feature | #Feature Sample 1 | Start | End | PTM           | AScore                    | Found By |
|----------------------|------|--------|----------|--------|-----|----------|---|-------|----------|------|-----------------------------|---------------|----------|-------------------|-------|-----|---------------|---------------------------|----------|
| S.LLLGAGCM(+15.99).S | Y    | 34.51  | 792.3874 | 8      | 1.4 | 397.1985 | 2 | 33.76 | 1        | 7091 | P2860-Aislado informe 2.raw | 6.1091E6      | 1        | 1                 | 345   | 352 | Oxidation (M) | M8:Oxidation (M):10 00.00 | PEAKS DB |
| total 1 peptides     |      |        |          |        |     |          |   |       |          |      |                             |               |          |                   |       |     |               |                           |          |

Best Unique PSM (Scan 7091, m/z=397.1985, z=2, RT=33.76, ppm=1.4):

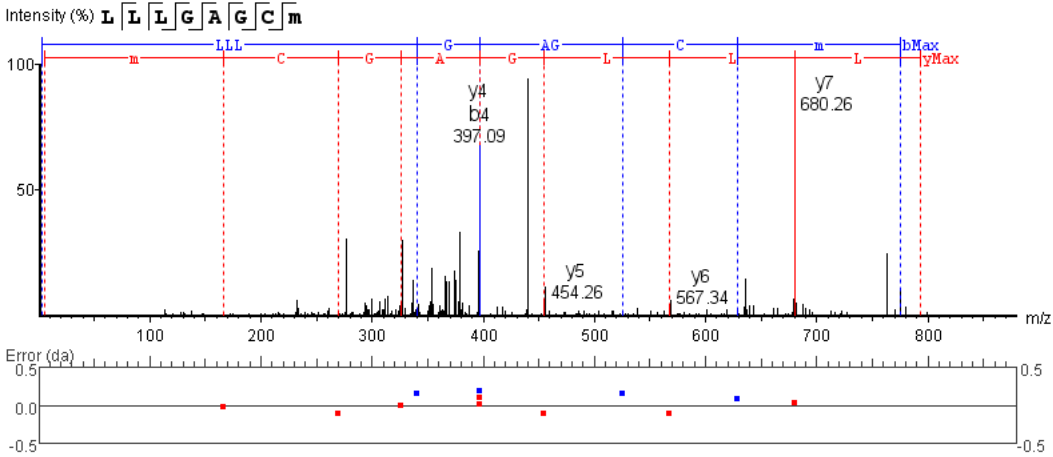

OE9A087501P1

[back to list](#)

| [Protein Coverage](#) | [Supporting Peptides](#) | [Best Unique PSM](#) |

Protein Coverage:



1 MPSCFPITGK TTLAQNVIFD PSPSRSMENPN RVLIVMNGLK DVSIELLEWV LKNFTFHDG TITIFGVSPW LNIPLSAKTW  
81 SDIWSMDLED LSIVKERIEW KNDPKYQKVL RLVDLCQKYG VVPEIRTEMG HPLRLLVVEQ ISSLNATLVV FDKYHDRKNI  
161 EYYAEKVPCN MVVVNDNGEV ELIKKRSCMD SDVENTPTTI AESSDAAAMA **NCSTSIISGQ** LKKRLKSKSR GKRDKEMKYP  
241 DTD

Supporting Peptides:

| Peptide          | Uniq | -10lgP | Mass     | Length | ppm | m/z      | z | RT    | Fraction | Scan | Source File                 | Area Sample 1 | #Feature | #Feature Sample 1 | Start | End | PTM | AScore | Found By |
|------------------|------|--------|----------|--------|-----|----------|---|-------|----------|------|-----------------------------|---------------|----------|-------------------|-------|-----|-----|--------|----------|
| A.NCSTSIISG.Q    | Y    | 39.01  | 880.3961 | 9      | 9.5 | 441.2062 | 2 | 35.88 | 1        | 7180 | P2860-Aislado informe 2.raw | 3.4884E7      | 1        | 1                 | 211   | 219 |     |        | PEAKS DB |
| total 1 peptides |      |        |          |        |     |          |   |       |          |      |                             |               |          |                   |       |     |     |        |          |

Best Unique PSM (Scan 7180, m/z=441.2062, z=2, RT=35.88, ppm=9.5):

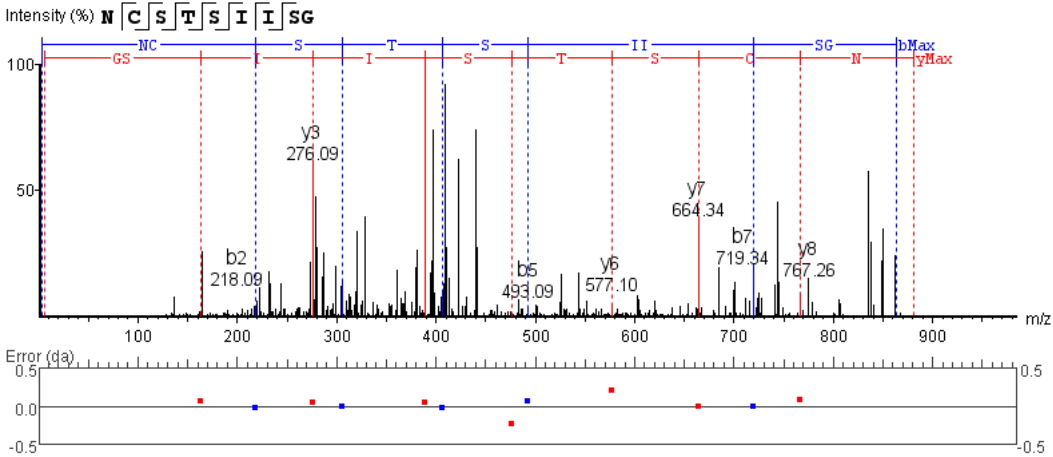

OE9A013295P1

[back to list](#)

| [Protein Coverage](#) | [Supporting Peptides](#) | [Best Unique PSM](#) |

Protein Coverage:

1 MHPRKLLVLL IFISLSFHPD YVLPENVNLD FPFFTLRNIT LLGDSYIRNG VVGLTRELEV PSSSSGSVIY NYPVAFFDPE  
81 TNITASFSTR FSFSIDNVNP SSFGDGLTFF LSPNNQTLGS PGGYLGVLNS SQLTKERFIA IEFDRQDLL FNDPDENHVG  
161 LDINSLNSIK TANSMIQGVN LKGGNLITAW IDYENEKKKL EIFLSYSSFK PEEPLLRGVG DLSDYLKEFM YVG**FSASTEG**  
241 **S**TELFHIQNW NFRTLGRPI RPKIHPYNVS ESSVPLRPPI TVSDSGNRHH KRIGLGLGIG FPAFFCTVLV GFGWISIKKW  
321 KGIKSERTIK AEMVTGPRQF SYKELKSATR GFHSSRILGH GAFGTVFKA FMDLGTISAV KRSKHTHEGK TEFLSELSII  
401 ASLRHKNLVQ LQGWCVEKGE LLLVYDFMPS GSLDKVLYQE SENGPNLKWY YRYNSAVGLA SVLTYLHQEC EQQVIHRDIK  
481 TSNVMDGNY NARLGDFGLA RLMDHGTSPV STLTAGTMGY LAPEYLQYGA ATEKTDVFSY GVVILELACG RRPRIEDES  
561 QKPVNLVDWV WRKYSEGKLL EAADQRMNGE FKKEEMKRL LIGLSCANPN SSERPSMRRV FQILNNEADP VVVPKVKPSL  
641 ISRTACH

Supporting Peptides:

| Peptide          | Uniq | -10lgP | Mass     | Length | ppm | m/z      | z | RT    | Fraction | Scan | Source File                 | Area Sample 1 | #Feature | #Feature Sample 1 | Start | End | PTM | AScore | Found By |
|------------------|------|--------|----------|--------|-----|----------|---|-------|----------|------|-----------------------------|---------------|----------|-------------------|-------|-----|-----|--------|----------|
| G.FSASTEGS.T     | Y    | 32.74  | 784.3239 | 8      | 0.5 | 393.1665 | 2 | 25.27 | 1        | 4197 | P2860-Aislado informe 2.raw | 9.6294E5      | 2        | 2                 | 234   | 241 |     |        | PEAKS DB |
| total 1 peptides |      |        |          |        |     |          |   |       |          |      |                             |               |          |                   |       |     |     |        |          |

Best Unique PSM (Scan 4197, m/z=393.1665, z=2, RT=25.27, ppm=0.5):

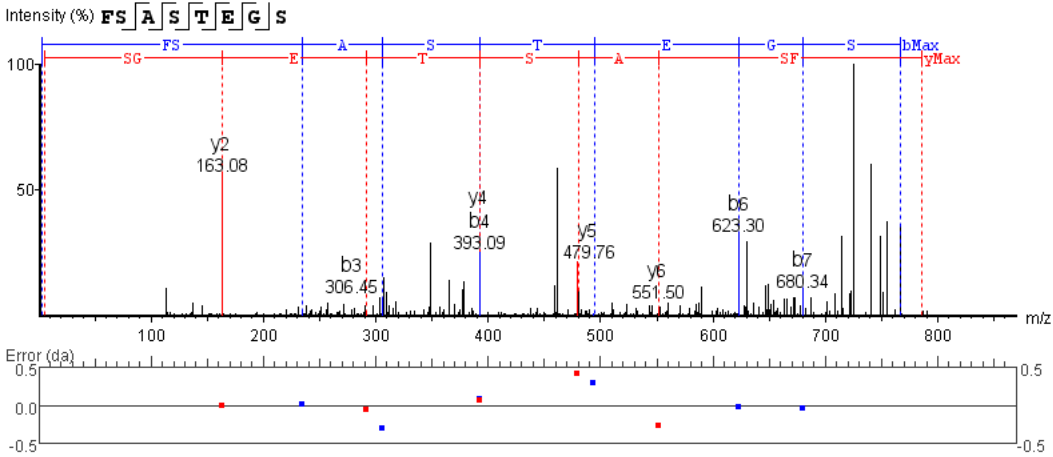

OE9A042038P1

[back to list](#)



Protein Coverage:

|     |                     |            |             |            |            |            |            |                    |
|-----|---------------------|------------|-------------|------------|------------|------------|------------|--------------------|
| 1   | MSPRKLLVFL          | ILINLSVHPD | YVSSANVNLD  | FFFTFRNIT  | LLGDSYLRNG | VIGLTRELGV | PSSSSGTVIY | NHPVAFFDPE         |
| 81  | TNITASFSTR          | FSFSIDNVNP | SSFGDGLAFF  | LSPNNQTLGS | PGGYLGLVNS | SEFSKNRFIA | IEFDTKQDLH | FNDPDENHVG         |
| 161 | LDINSLISIK          | TANSMIRGVN | LKSGNLITAW  | IDYENEKKKF | EIFLSYSSFK | PEEPLLRVSI | DLSDYLKEFM | YVG <b>FSASTEG</b> |
| 241 | <b>S</b> TELHCIENTW | SFRTMGFRPI | RPKVQPHSVS  | ESSVPLKPPI | TVSGSGNRHH | KRIGLGLGIG | FPAFFGAVLV | IFGWISVKKW         |
| 321 | KGTKSERIIK          | AELVTGPRQF | SYKELKSATR  | GFHSSRILGH | GAFGTVYKAF | FMDLGTISAV | KRSKHTHEGK | TEFLSELSII         |
| 401 | ASLRHKNLVQ          | LQGWCVEKGE | LLLVDYDFMPN | GSLDKVLYQE | SENNNPLKWT | YRYIIAVGLA | SVLTYLHQEC | EQQVIHRDIK         |
| 481 | TSNVMLDGNV          | NARLGDFGLA | RLMDHGTSPV  | STLTAGTMGY | LVPEYLQYGT | ATEKTDVYSY | GVVVLELACG | RRPIEREDES         |
| 561 | QKQVNLVDWV          | WRKYSEGKLI | EAADQRMNGE  | FKEEEMRRL  | LIGLSCANPD | SSERPSMRRV | LQILNNEADP | VIVPKVKPSL         |
| 641 | IFNSNLPLSI          | DEIVSDCEEC | SSPGSELEIK  | VY         |            |            |            |                    |

Supporting Peptides:

| Peptide          | Uniq | -10lgP | Mass     | Length | ppm | m/z      | z | RT    | Fraction | Scan | Source File                 | Area Sample 1 | #Feature | #Feature Sample 1 | Start | End | PTM | AScore | Found By |
|------------------|------|--------|----------|--------|-----|----------|---|-------|----------|------|-----------------------------|---------------|----------|-------------------|-------|-----|-----|--------|----------|
| G.FSASTEGS.T     | Y    | 32.74  | 784.3239 | 8      | 0.5 | 393.1665 | 2 | 25.27 | 1        | 4197 | P2860-Aislado informe 2.raw | 9.6294E5      | 2        | 2                 | 234   | 241 |     |        | PEAKS DB |
| total 1 peptides |      |        |          |        |     |          |   |       |          |      |                             |               |          |                   |       |     |     |        |          |

Best Unique PSM (Scan 4197, m/z=393.1665, z=2, RT=25.27, ppm=0.5):

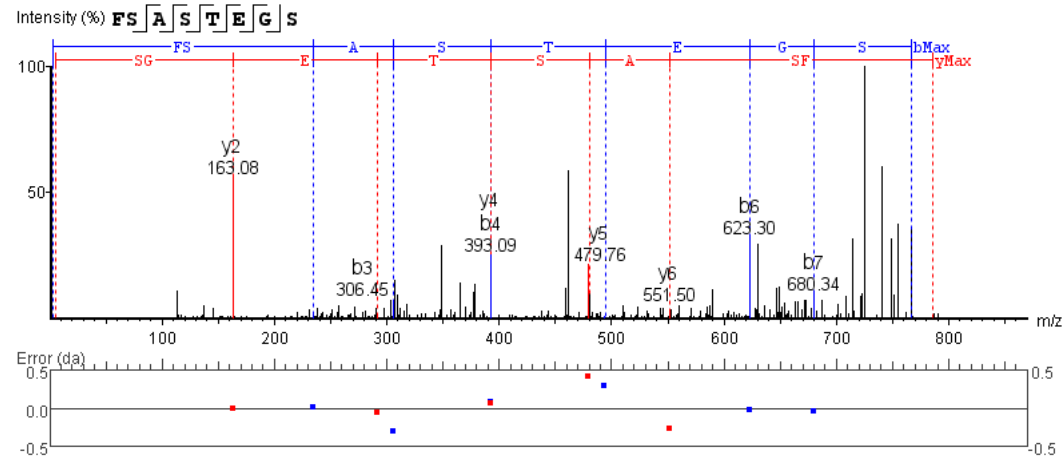

OE9A062197P1

[back to list](#)

Protein Coverage:

|     |                    |            |            |            |            |            |            |                    |
|-----|--------------------|------------|------------|------------|------------|------------|------------|--------------------|
| 1   | MNSRKLLVVS         | TLLFLFNFWQ | HPLLVSSENV | NLDFFVFSFR | NFTILGDSYL | RNGVFGLTRE | LEVPTSSSGC | VIYNHPIEFF         |
| 81  | DRETNITASF         | STRFSFSIGN | VNPSSFGDGL | TFFISPNNQT | VGNAGGYLGL | VNSSQLTKNR | FTAIEFDTRQ | DLHFNDPDDN         |
| 161 | HVGLDINSLI         | SIKTANPTLQ | SVNLKSGNLI | TAWIDYMNEK | KKLDVFLSYS | SFKPEKPLL  | VNVDLSGYLN | EFMYVG <b>FSAS</b> |
| 241 | <b>TEGS</b> TELHYI | ENWSFQTMGF | HPVRPRIHPH | NVSDSSVPHT | PPTPVSDSGN | KNHKRIRLGL | GVGFPAFFCS | VLVVFGWISF         |
| 321 | KKWRESRTEK         | CLKAELVTGP | RQYSYKEIKS | ATRGFHSSRI | VGHGAFGTVY | KAFFTDLGTI | SAVKRSKHAH | EGKTEFLAEL         |
| 401 | SIIACLRHKN         | LVPLQGWCV  | KGELLLVYEF | MPHGSLDSSL | YSDSEHGNNL | QWSYRYNIAV | GLASVLTYLH | QECEQQVIHR         |
| 481 | DVKTSNIMLD         | ANYNARLGDF | GLARIMDHGK | SPVSTLTAGT | MGYLAPEYLQ | YGKATEKTDV | FSYGVVILEL | ASGRRPIERE         |
| 561 | TGSQKMVNLV         | DWAWMLHSEG | KIIEAADKNM | NGEYDEKEMK | KLLLIGLSCA | NPDSMERPSM | RAVLQILNNE | AEPMVVPKAK         |
| 641 | PTLTFSNSLP         | LSIDDIVLDC | EDIVIPESQF | EIRPE      |            |            |            |                    |

Supporting Peptides:

| Peptide          | Uniq | -10lgP | Mass     | Length | ppm | m/z      | z | RT    | Fraction | Scan | Source File                 | Area Sample 1 | #Feature | #Feature Sample 1 | Start | End | PTM | AScore | Found By |
|------------------|------|--------|----------|--------|-----|----------|---|-------|----------|------|-----------------------------|---------------|----------|-------------------|-------|-----|-----|--------|----------|
| G.FSASTEGS.T     | Y    | 32.74  | 784.3239 | 8      | 0.5 | 393.1665 | 2 | 25.27 | 1        | 4197 | P2860-Aislado informe 2.raw | 9.6294E5      | 2        | 2                 | 237   | 244 |     |        | PEAKS DB |
| total 1 peptides |      |        |          |        |     |          |   |       |          |      |                             |               |          |                   |       |     |     |        |          |

Best Unique PSM (Scan 4197, m/z=393.1665, z=2, RT=25.27, ppm=0.5):

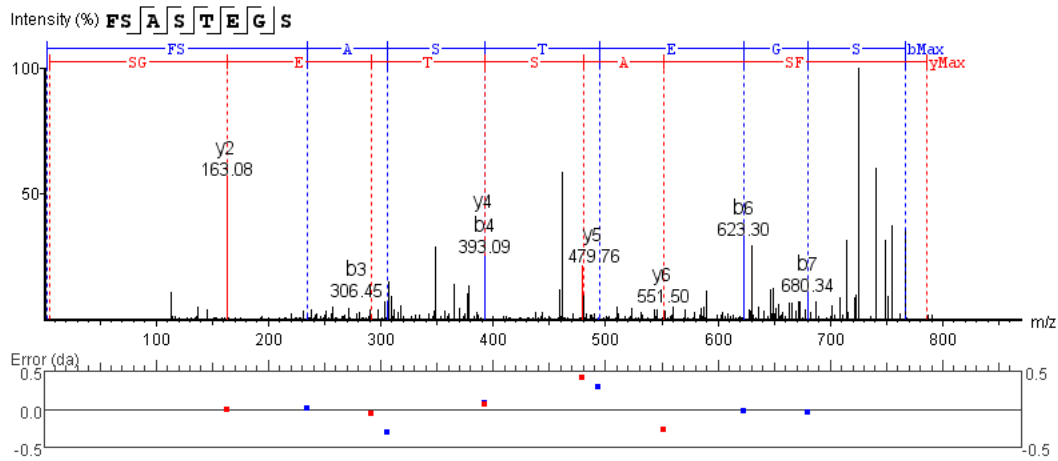

**OE9A106456P1**

[back to list](#)

| [Protein Coverage](#) | [Supporting Peptides](#) | [Best Unique PSM](#) |

**Protein Coverage:**

1 MEIEDDSGGQ DLKSGTALPS RSGKSTMVGL DKELIEILNW **LDGNSSAR** DTLSIVGMPGIG KTTFAGKIYD HQRVQEIFHV

81 RAWVTVSQNY DERKILLDLL ESMKKLSGEM HNLETSCLKD KLHKNLKGRR YLIVIDDIWD TKVWNDVNRL FPVDQKRSRI

161 ILTTRLESVA VHVNSSRFAF RRMFLNGVE SWNLFCVKVF GDCCPGELYQ TGTEIAKKCG GLPLAIVLIG GLLSKSNQTQ

241 SYWDHVAKNL SSVIASHDDQ SSKILHLSYN NLPHHLRECF LYMGIFPEDY EILASKLVKL WTAEGFIETE TSKSLEDVAK

321 EYLKNLVERS LILVSKRSSD GEIKTCKIHD LLREFCVREA KESFFHVTDT SLRDLPTNIS TSHITDPSLR SLPDKIISLR

401 RVSIHPNTQT SHPHADRLPT STVRSVLNFD PTLSSLVEFL NSSLIRVLDV VNGNSSDFPT EIVKLLNLRY LSCLNGVREL

481 PSPIHELRLNL QTLILSCMES SFRLPLEIWR MTQLRHVHLD LVSLPDPIIE RVEENPLVV LHDQLSLSTV MNFKFVENIL

561 RRIPNLKKLG ILFDEIGEDW SDYCLNNLAL LQNLALCKL FNWPYKPLQ KIIFPPSLKK LTLRGCFPLW EDMTIIGSLE

641 KLQVLKLRK AFSGTVWEPK EGEFLELEFL LLENNLEDW NAERTHFPKL EHLILDNCQR LKEVPCGIGE IPTLQKIELY

721 YCSDSLVTS KDIYEEQQES GNEDFQVRIV EMTAEAYET

**Supporting Peptides:**

| Peptide          | Uniq | -10lgP | Mass     | Length | ppm  | m/z      | z | RT    | Fraction | Scan | Source File                 | Area Sample 1 | #Feature | #Feature Sample 1 | Start | End | PTM | AScore | Found By |
|------------------|------|--------|----------|--------|------|----------|---|-------|----------|------|-----------------------------|---------------|----------|-------------------|-------|-----|-----|--------|----------|
| W.LDGNSSAR.D     | Y    | 31.66  | 818.3882 | 8      | -4.9 | 410.1964 | 2 | 18.63 | 1        | 2491 | P2860-Aislado informe 2.raw | 7.3958E4      | 1        | 1                 | 41    | 48  |     |        | PEAKS DB |
| total 1 peptides |      |        |          |        |      |          |   |       |          |      |                             |               |          |                   |       |     |     |        |          |

**Best Unique PSM (Scan 2491, m/z=410.1964, z=2, RT=18.63, ppm=-4.9):**

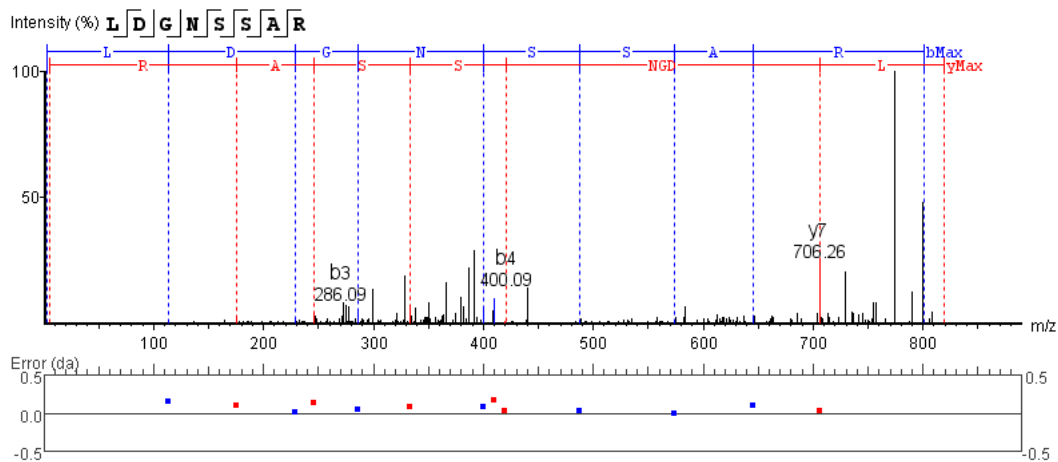

**OE9A058866P1**

[back to list](#)

| [Protein Coverage](#) | [Supporting Peptides](#) | [Best Unique PSM](#) |

**Protein Coverage:**

1 MASLASPVNL GSVSMISSCQ FEGSVCLVRR VAFRGNGNNF RRFLGGKRWR YVGICKYSVT TNYITEQGTSTSTDSTCRGS  
81 KDNDDTDFLK AAPKPVLPKG SKVEPVLDMF WDEVKLKEDS SNEKTSESEE ERSKVIESLG EVLEMAEKLE KSKEPNVSVN  
161 KPSGNKNAGL KNGKPVNSMA DSNSKSKTSK SVWRKGNPVA AAPKVVKKEPP KQDSRIDNRG KDASHAVTTP RPPQPPQNVN  
241 PQLQAKPSVA PPVSIKKPVI LKDVNAATKS SVADETNSTT AKKERKPILI DKFASKKPVV DPLIAQAVLA PPKPGKSPPP  
321 GKFKDEFRRK GGPSGGSRRR MFDDDIPDED ASELDVSIPG AATARKGRKW TKASRKAARL QAAKDAAPVK VEIMEVDEDG  
401 MLTEELAYNL AISEGEILGY LYSKGIKPDG VQKLSKDMVK MICREYEVEI IDTAPVRVEE MAKKKEMFDN DDLKLEDRP  
481 PVLTIMGHVD HGKTTLLDYI RSKVAASEA GGITQIGIGAY KVQVPIDGKP QICVFLDTPG HEAFGAMRAR GARVTDIAVI  
561 VVAADDGIQP QTNEAIAHAK SAVVPIIVAI NKIDKDGANP DRVMQDLSSI GLMPEEWGGD IPVVKISALK GENVDDLLET  
641 IMLVAELQDL KANPHRNAKG TVIEAGLDKS KGPVATFIVQ NGTLNRGDVV **VCGEAFGKA** ALFDDKGKRI DEAGPSMPVQ  
  
721 VIGLNNVPLA GDEFEVVGSL DVAHEKAELQ ANYLRNERIT AKAGDGKVTL SSLASAVSAG KLTGLDLHLQ NIILKVDLQG  
801 SIEAIRQALQ VLPQNTVTLK FLLQATGDVS TSDVDLAVAS KAIIFGFNVK APGSIKSYAD NKGVEIRLYR VIYELIDNVR  
881 KAMEGLLETV EEQVPIGSAE VRAVFSSGSS RVAGCMVTDG KIVKDSGIRV LRGKKEVHVG VLSSLRRVKE LVKEVNAGLE  
961 CGIGVEEFDD WEEGDRIEAF NTVQKKRTLE EASASMTAAL EGVGIEL

Supporting Peptides:

| Peptide          | Uniq | -10lgP | Mass     | Length | ppm  | m/z      | z | RT    | Fraction | Scan | Source File                 | Area Sample 1 | #Feature | #Feature Sample 1 | Start | End | PTM | AScore | Found By |
|------------------|------|--------|----------|--------|------|----------|---|-------|----------|------|-----------------------------|---------------|----------|-------------------|-------|-----|-----|--------|----------|
| V.VCGEAFGKA.R    | Y    | 31.36  | 880.4113 | 9      | -8.2 | 441.2060 | 2 | 33.38 | 1        | 6569 | P2860-Aislado informe 2.raw | 4.1833E6      | 1        | 1                 | 691   | 699 |     |        | PEAKS DB |
| total 1 peptides |      |        |          |        |      |          |   |       |          |      |                             |               |          |                   |       |     |     |        |          |

Best Unique PSM (Scan 6569, m/z=441.2060, z=2, RT=33.38, ppm=-8.2):

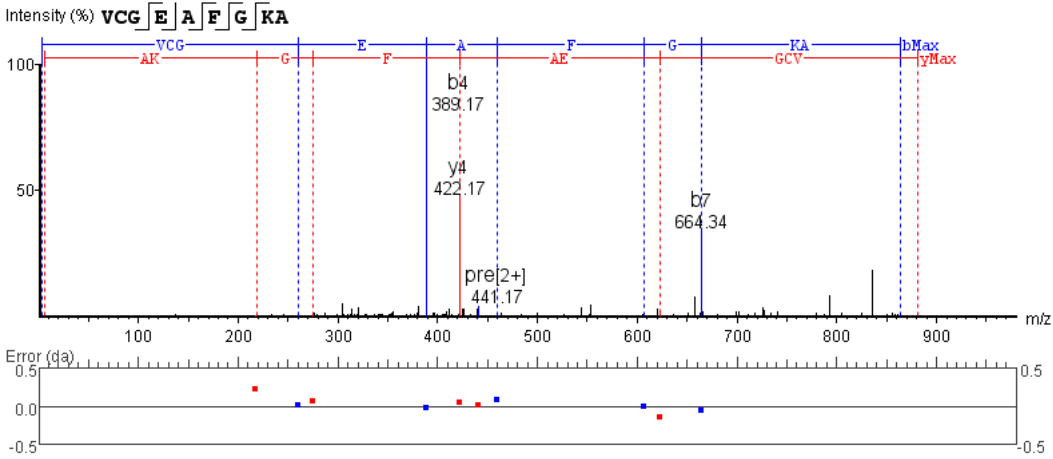

OE9A054657P1

[back to list](#)

| [Protein Coverage](#) | [Supporting Peptides](#) | [Best Unique PSM](#) |

Protein Coverage:

1 MPLLKEEPAD LEGSLAVTPS PPPQTGALVA APSKRSSRDR HTKVEGRGR IRMPAACAAR IFQLTRELGH KSNDETIRWL  
81 LERAEPAAIE ATGTVPPSPS PSTRQKRAQS SEFYDVTNSS NLAPVAPIAP QGLVPVFPSPG TFFMIPPTAG AATIAAAGLS  
161 NQPQFWAIPA TATPVFSISG RPISNFVSAM QAGVNMSFST STTTTTTTIN PTAVGGGAAA SSGNTESGEN SGGKISISTT  
241 MAPSSSSVTS KTTVATGTQT LRDFSLEIYD KKELQIMSGS **S GPGNHEQ**TPS SKP

Supporting Peptides:

| Peptide          | Uniq | -10lgP | Mass     | Length | ppm  | m/z      | z | RT    | Fraction | Scan | Source File                 | Area Sample 1 | #Feature | #Feature Sample 1 | Start | End | PTM | AScore | Found By |
|------------------|------|--------|----------|--------|------|----------|---|-------|----------|------|-----------------------------|---------------|----------|-------------------|-------|-----|-----|--------|----------|
| G.SGPGNHEQ.T     | Y    | 30.94  | 824.3413 | 8      | -6.5 | 413.1722 | 2 | 30.38 | 1        | 5739 | P2860-Aislado informe 2.raw | 0             | 0        | 0                 | 280   | 287 |     |        | PEAKS DB |
| total 1 peptides |      |        |          |        |      |          |   |       |          |      |                             |               |          |                   |       |     |     |        |          |

Best Unique PSM (Scan 5739, m/z=413.1722, z=2, RT=30.38, ppm=-6.5):

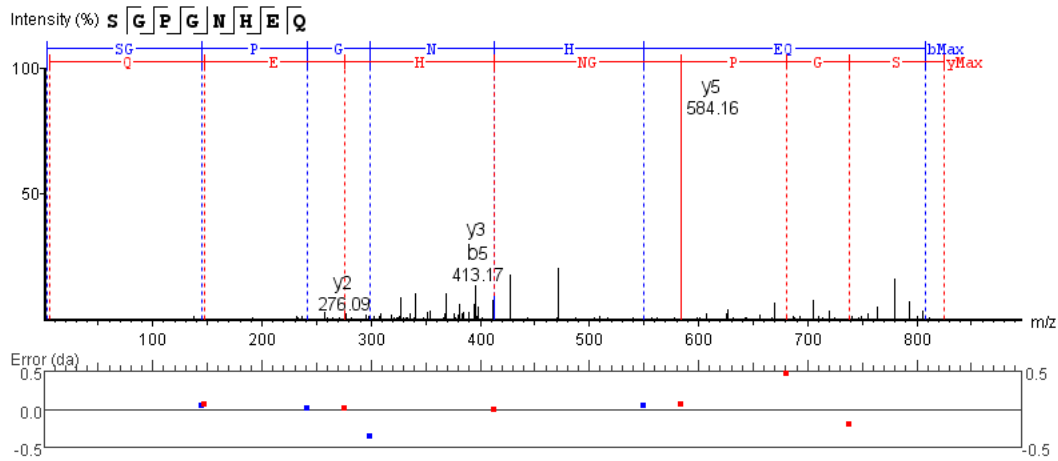

OE9A104108P1

[back to list](#)

| [Protein Coverage](#) | [Supporting Peptides](#) | [Best Unique PSM](#) |

Protein Coverage:

1 MASIHRNHHS QPQHSHHHS PPHIERQEH D EVITLPSDPL LGESHEYITIT AFGPPPDAAE TNPSPPPLPP PSSDIMPLLK  
81 EEPADLEGSL AVTPSPPPQT GALVAAPPKR SSRDRHTKVE GRGRRIRMPA ACAARIFQLT RELGHKSDGE TIRWLLERAE  
161 PAIEEATGTG TVPAIAVSVN GTLKIPTTPS TASTSPETAG DGARKRRKRA QSSEFYDVAN SSNLAPVAPI APQGLVPLFP  
241 SGTFMFIPPT AGAATIAAAG PSNQPFQWAI PATATPVFSI SGRPMSNFVS AMQAGVNMSF STSSTTTTIN PTAVGGGAAA  
321 SSGNTESGEN SGGKISISTT MAPSSSVTS KTTVATGTQT LRDFSLEIYD KKELQFMSG S **GPGNHEQ**TPS SKP

Supporting Peptides:

| Peptide          | Uniq | -10lgP | Mass     | Length | ppm  | m/z      | z | RT    | Fraction | Scan | Source File                 | Area Sample 1 | #Feature | #Feature Sample 1 | Start | End | PTM | AScore | Found By |
|------------------|------|--------|----------|--------|------|----------|---|-------|----------|------|-----------------------------|---------------|----------|-------------------|-------|-----|-----|--------|----------|
| G.SGPGNHEQ.T     | Y    | 30.94  | 824.3413 | 8      | -6.5 | 413.1722 | 2 | 30.38 | 1        | 5739 | P2860-Aislado informe 2.raw | 0             | 0        | 0                 | 380   | 387 |     |        | PEAKS DB |
| total 1 peptides |      |        |          |        |      |          |   |       |          |      |                             |               |          |                   |       |     |     |        |          |

Best Unique PSM (Scan 5739, m/z=413.1722, z=2, RT=30.38, ppm=-6.5):

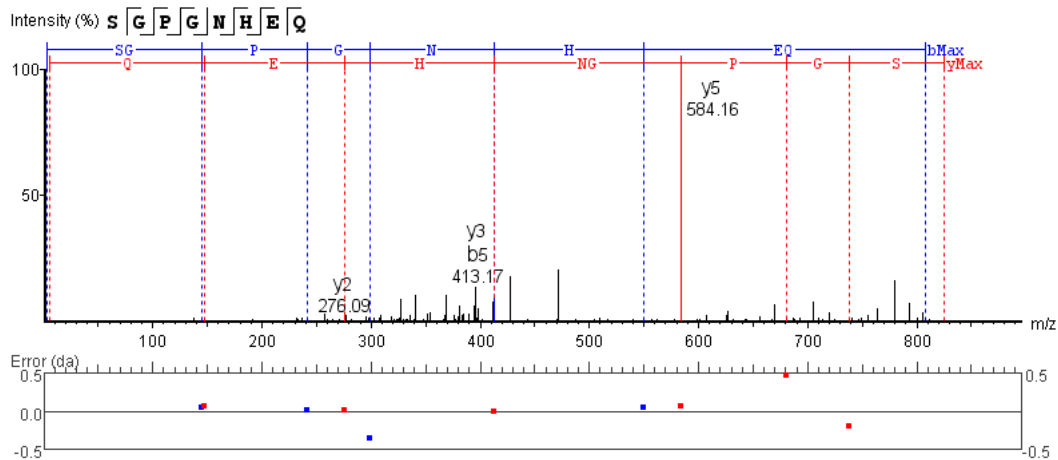

OE9A026632P1

[back to list](#)

| [Protein Coverage](#) | [Supporting Peptides](#) | [Best Unique PSM](#) |

Protein Coverage:

1 MKNTSSGDAE GSSPNSTNPP QQLDQSSPTS SPLRRPPMAP SVMGNLGHSG FRPYRPQGRQ QFDQSSPQRG SNSNISSPMQ  
81 RPPVAPPPPP PPPLPLPVIG HTGQSAFMAH WPQGPQPQRQ **FLGGGGSSGG AAC**ASGNASS NGLFGAQAIP VGRSGGYRFG  
161 GVGIGNPVIR KRVKEGNQGG QAEGGNPFQC RVC GKQFQSA KALFGHMRQL PDRGWKGTFP PPSFRAEEEF AEVPGHLNPG  
241 RAAAAGDAAA AQAGEEATEV HEGREEAGDG LVGPQNYKLP DLNYKPPHDD HDAAA

Supporting Peptides:

| Peptide          | Uniq | -10lgP | Mass     | Length | ppm  | m/z      | z | RT    | Fraction | Scan | Source File                 | Area Sample 1 | #Feature | #Feature Sample 1 | Start | End | PTM | AScore | Found By |
|------------------|------|--------|----------|--------|------|----------|---|-------|----------|------|-----------------------------|---------------|----------|-------------------|-------|-----|-----|--------|----------|
| F.LGGGGSSGGAAC.A | Y    | 30.30  | 892.3708 | 12     | -3.4 | 447.1878 | 2 | 20.67 | 1        | 2916 | P2860-Aislado informe 2.raw | 4.3063E5      | 1        | 1                 | 122   | 133 |     |        | PEAKS DB |
| total 1 peptides |      |        |          |        |      |          |   |       |          |      |                             |               |          |                   |       |     |     |        |          |

Best Unique PSM (Scan 2916, m/z=447.1878, z=2, RT=20.67, ppm=-3.4):

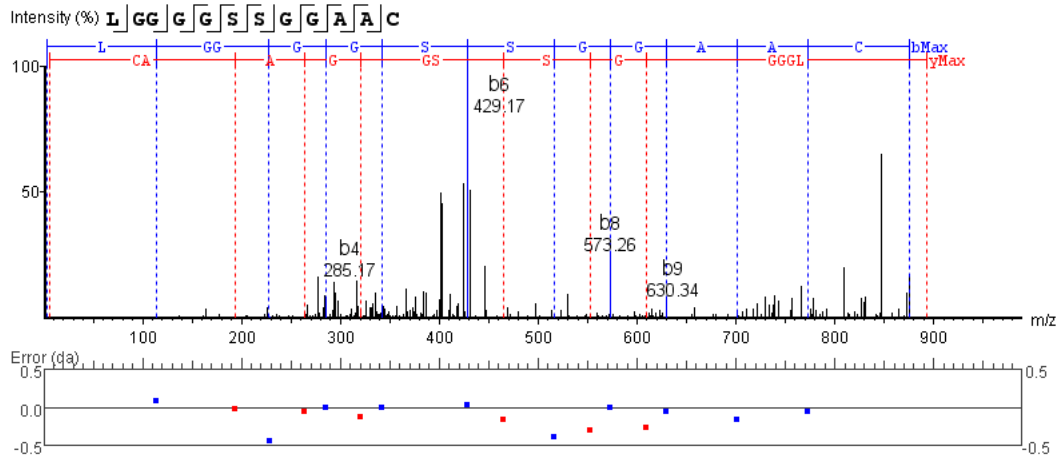

OE9A100476P1

[back to list](#)

[Protein Coverage](#) | [Supporting Peptides](#) | [Best Unique PSM](#) |

Protein Coverage:

1 MVTAKESCQQ LSAWNLPLND TLLQLRHNNLS LSCFPNSSSY AANVGFPGHS ICNLPGLKTG QLNRS DGFFQ NLPPCWESSS  
 81 PIINPYLKDS QFGLSHGIGM SMNPAGSSST SQKKFLIFDQ SGNNTLFFS PSFFPSQNQI IASTAAAGDH GTLDEVAVQT  
 161 EQEQQLVKP VVQEKWDENH LTVGSEVRED TEEINALLCS NSTDEYDEV T SMGHTPTTIE ERYDKDIQIG ELVEEVASSN  
 241 GSTKRQKLLD GGYKKSSLVD MGDPLEMASP QNYEDGEESS CAGENN FYDD IDS IKKVKV K KIRESLKILE SIIPGLKNKD  
 321 PLLIIDRAII YLNSLKLEAE TLGISYL

Supporting Peptides:

| Peptide          | Uniq | -10lgP | Mass     | Length | ppm | m/z      | z | RT    | Fraction | Scan | Source File                 | Area Sample 1 | #Feature | #Feature Sample 1 | Start | End | PTM | AScore | Found By |
|------------------|------|--------|----------|--------|-----|----------|---|-------|----------|------|-----------------------------|---------------|----------|-------------------|-------|-----|-----|--------|----------|
| I.NALLCSNS.T     | Y    | 30.09  | 820.3749 | 8      | 8.1 | 411.1950 | 2 | 27.63 | 1        | 4927 | P2860-Aislado informe 2.raw | 2.2457E5      | 1        | 1                 | 195   | 202 |     |        | PEAKS DB |
| total 1 peptides |      |        |          |        |     |          |   |       |          |      |                             |               |          |                   |       |     |     |        |          |

Best Unique PSM (Scan 4927, m/z=411.1950, z=2, RT=27.63, ppm=8.1):

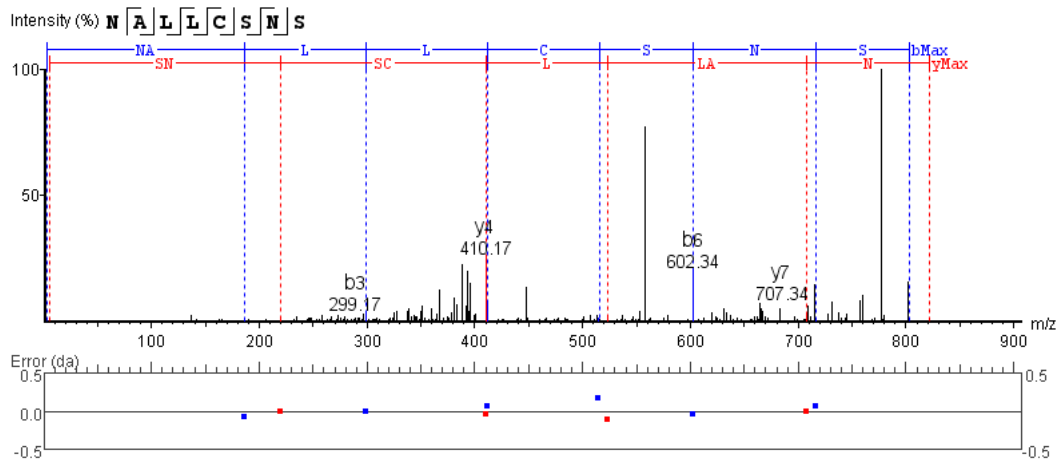

OE9A087887P1

[back to list](#)

[Protein Coverage](#) | [Supporting Peptides](#) | [Best Unique PSM](#) |

Protein Coverage:

1 MKTFVLVLLC LSSLMGALAQ GGVGSIISKS IFDQMLKHRN DANCPANGFY TYEAFIAAAN SFGAFGTTGD TDTRKREVA  
 81 FLAQTSHETT GGWASAPDGP YAWGYCHKQE EGNPPDYCVA NQWPCAPGK KYFGRGPIQI SYN NYGPAG RAIGSDLLNN  
 161 PDAVANDPTI SFKTALWFWM TPQTPKPSCH DAISGRWRPS AADSTAGRLP GYGVTNTIIN GGIECGKGSN PQVEDRIGFY  
 241 KRYCDLLGVG YGPNLDCYNQ RPFA

Supporting Peptides:

| Peptide          | Uniq | -10lgP | Mass     | Length | ppm | m/z      | z | RT    | Fraction | Scan | Source File                 | Area Sample 1 | #Feature | #Feature Sample 1 | Start | End | PTM | AScore | Found By |
|------------------|------|--------|----------|--------|-----|----------|---|-------|----------|------|-----------------------------|---------------|----------|-------------------|-------|-----|-----|--------|----------|
| N.CPANGFY.T      | Y    | 29.54  | 770.3057 | 7      | 6.7 | 386.1598 | 2 | 26.19 | 1        | 4510 | P2860-Aislado informe 2.raw | 0             | 0        | 0                 | 44    | 50  |     |        | PEAKS DB |
| total 1 peptides |      |        |          |        |     |          |   |       |          |      |                             |               |          |                   |       |     |     |        |          |

Best Unique PSM (Scan 4510, m/z=386.1598, z=2, RT=26.19, ppm=6.7):

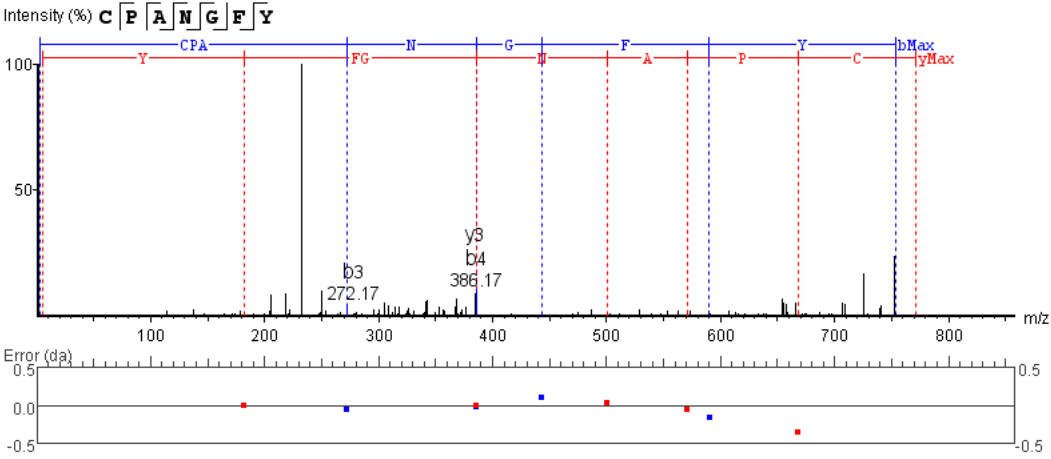

Peptide List

Prepared with PEAKS™ (bioinform.com)
