# Supplementary material for: Characterisation of Endogenous Peptides Present in Virgin Olive Oil
Source: Int J Mol Sci. 2022 Feb 2;23(3):1712. doi: 10.3390/ijms23031712 (PMC8836281; doi:10.3390/ijms23031712)
Supplement: Supplementary file 1 [file ijms-23-01712-s001.zip]

Archive with 4 entries (4 files):
- 1. Supplemental material Figure S1.pdf
- 1. Supplemental Material S2.pdf
- 1. Supplemental material Table S1.pdf
- 1. Supplemental material Table S3.pdf
